# Supplementary material for: Access to a pair of ambiphilic phosphine–borane regioisomers by rhodium-catalyzed hydroboration
Source: Royal Society of Chemistry journal article supplement (doi:10.1039/c8dt01467a), 2018-01-01
Supplement: c8dt01467a1.pdf [file c8dt01467a1.pdf]

# Access to a Pair of Ambiphilic Phosphine–Borane Regioisomers by Rhodium-Catalyzed Hydroboration

Brian R. Nichols, Novruz G. Akhmedov, Jeffrey L. Petersen, and Brian V. Popp\*

C. Eugene Bennett Department of Chemistry, West Virginia University,  
Morgantown, West Virginia, 26505, USA.

## Supporting Information

### Table of Contents

|                                                          |     |
|----------------------------------------------------------|-----|
| Diphenylvinylphosphine Hydroboration Product NMR Spectra | S2  |
| Reaction Optimization Screening Tables                   | S7  |
| Catalyst Screening NMR spectra                           | S8  |
| NMR spectra of Compounds <b>9</b> – <b>12</b>            | S12 |
| X-ray Crystallographic Data for Complex <b>7</b>         | S20 |
| X-ray Crystallographic Data for Complex <b>8</b>         | S34 |
| X-ray Crystallographic Data for Complex <b>12</b>        | S50 |

Fig. S-1. Stackplot of 1D NMR Spectra for Crude Hydroboration Product Mixture.

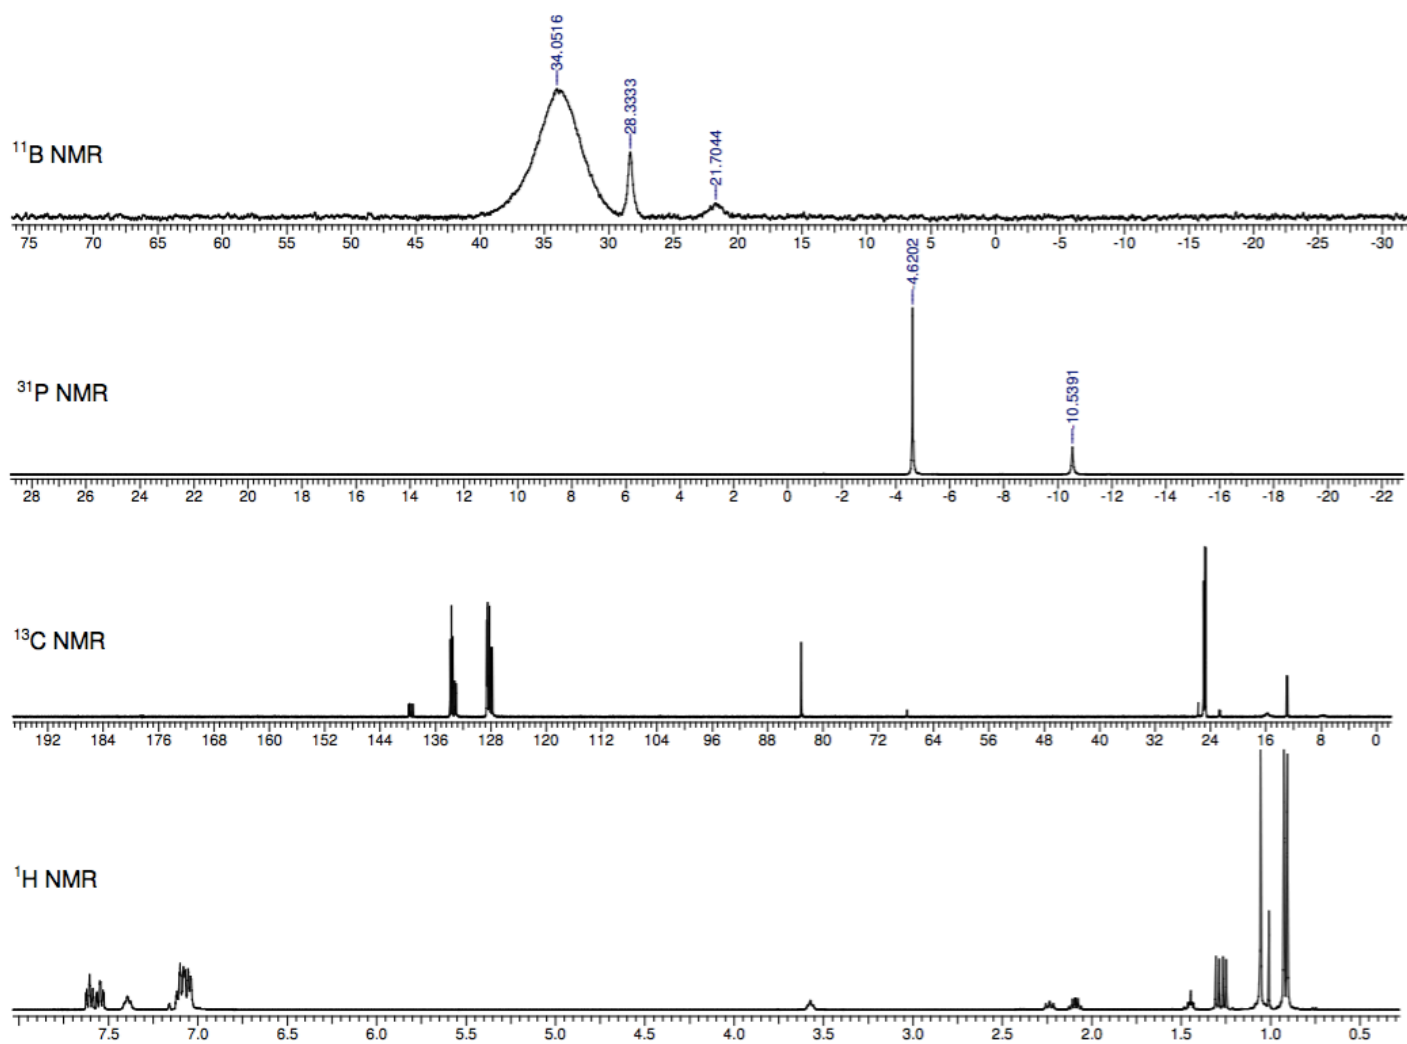

**Fig. S-2.** Crude hydroboration product characterization: (a)  $^1\text{H}$  NMR and (b)  $^1\text{H}\{^{31}\text{P}\}$  NMR spectra.

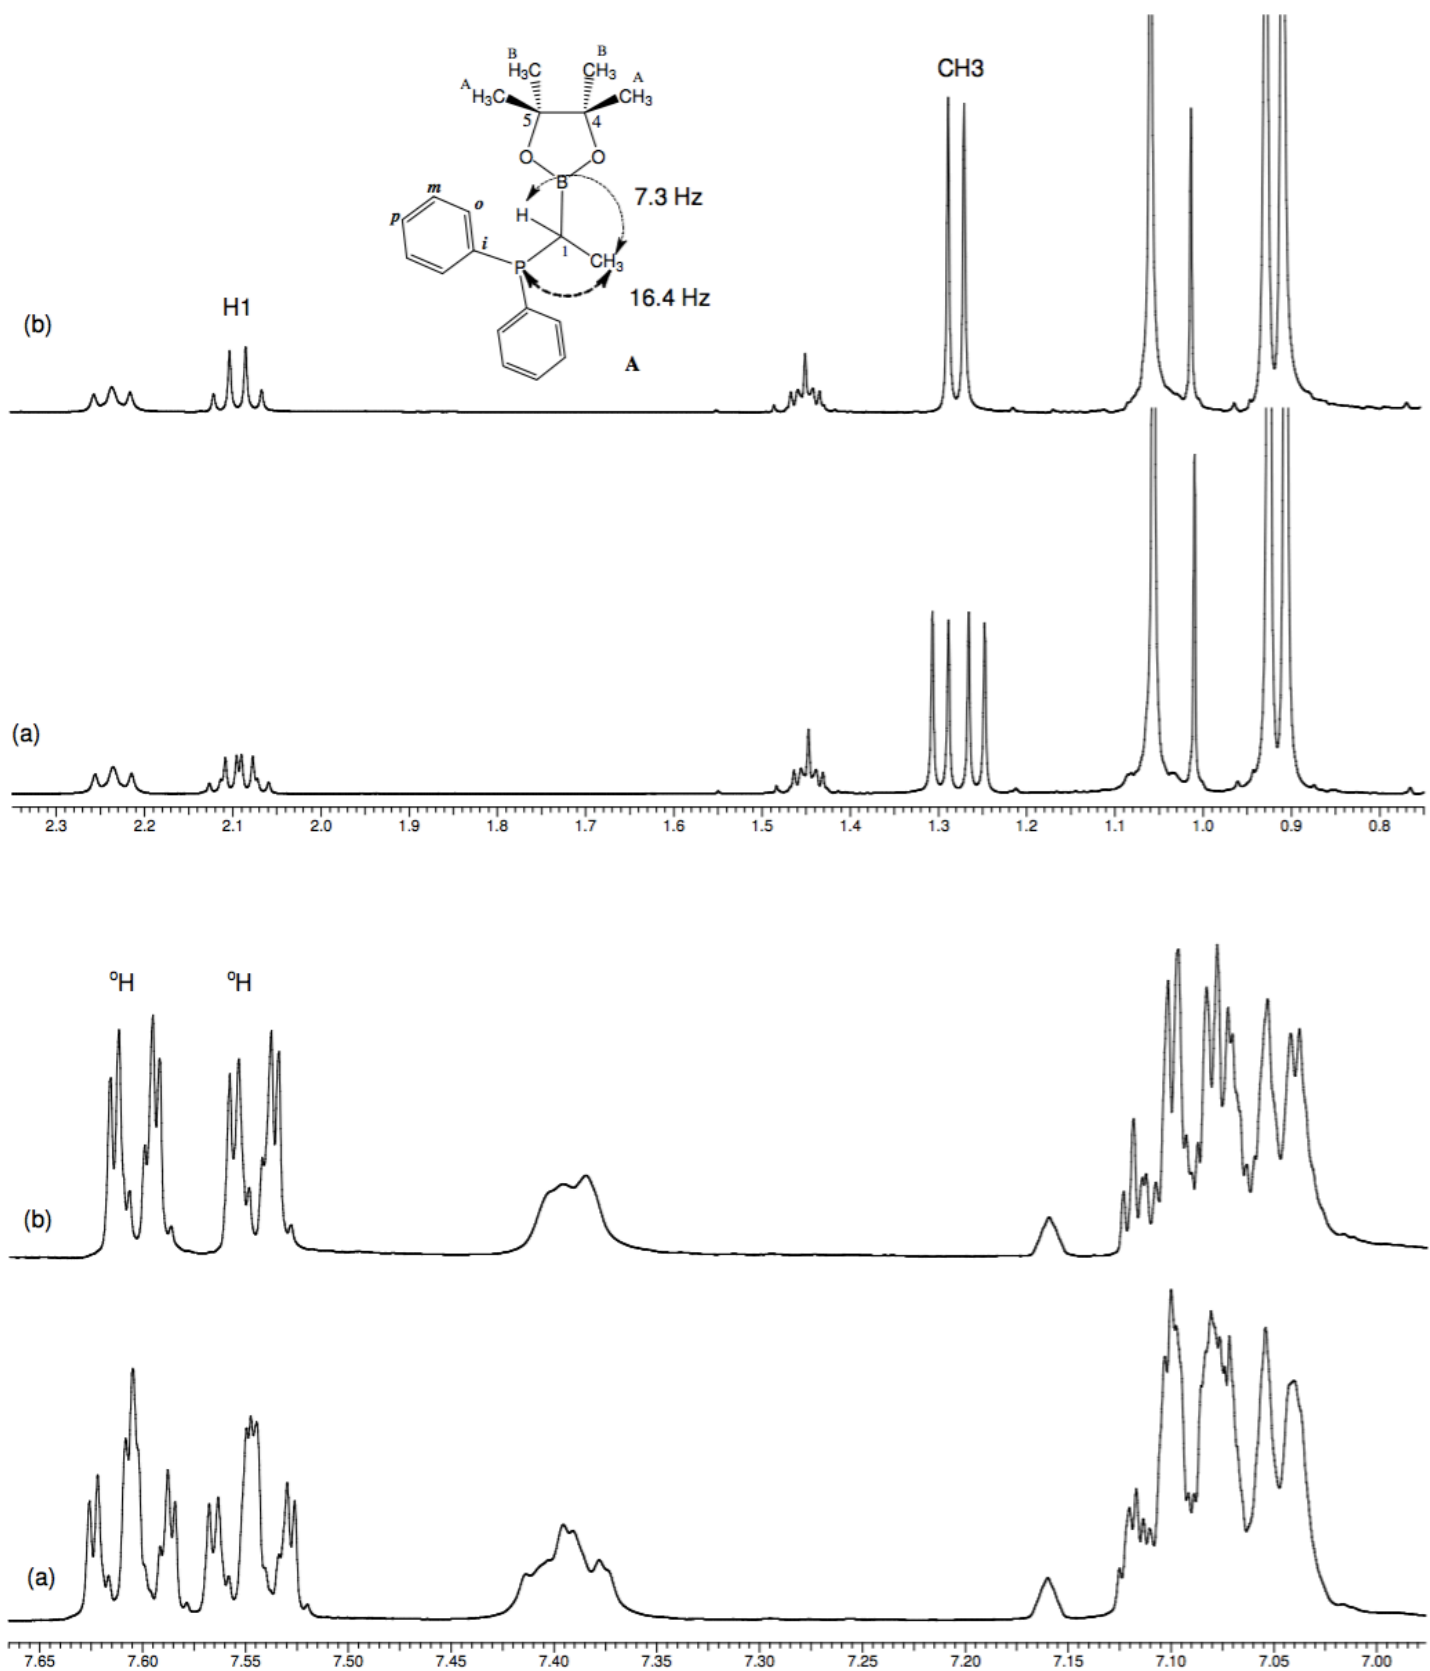

**Fig. S-3.** Crude hydroboration product characterization: 1D TOCSY NMR spectrum (mix time = 80 ms) with selective excitation of resonance 1-CH<sub>2</sub>.

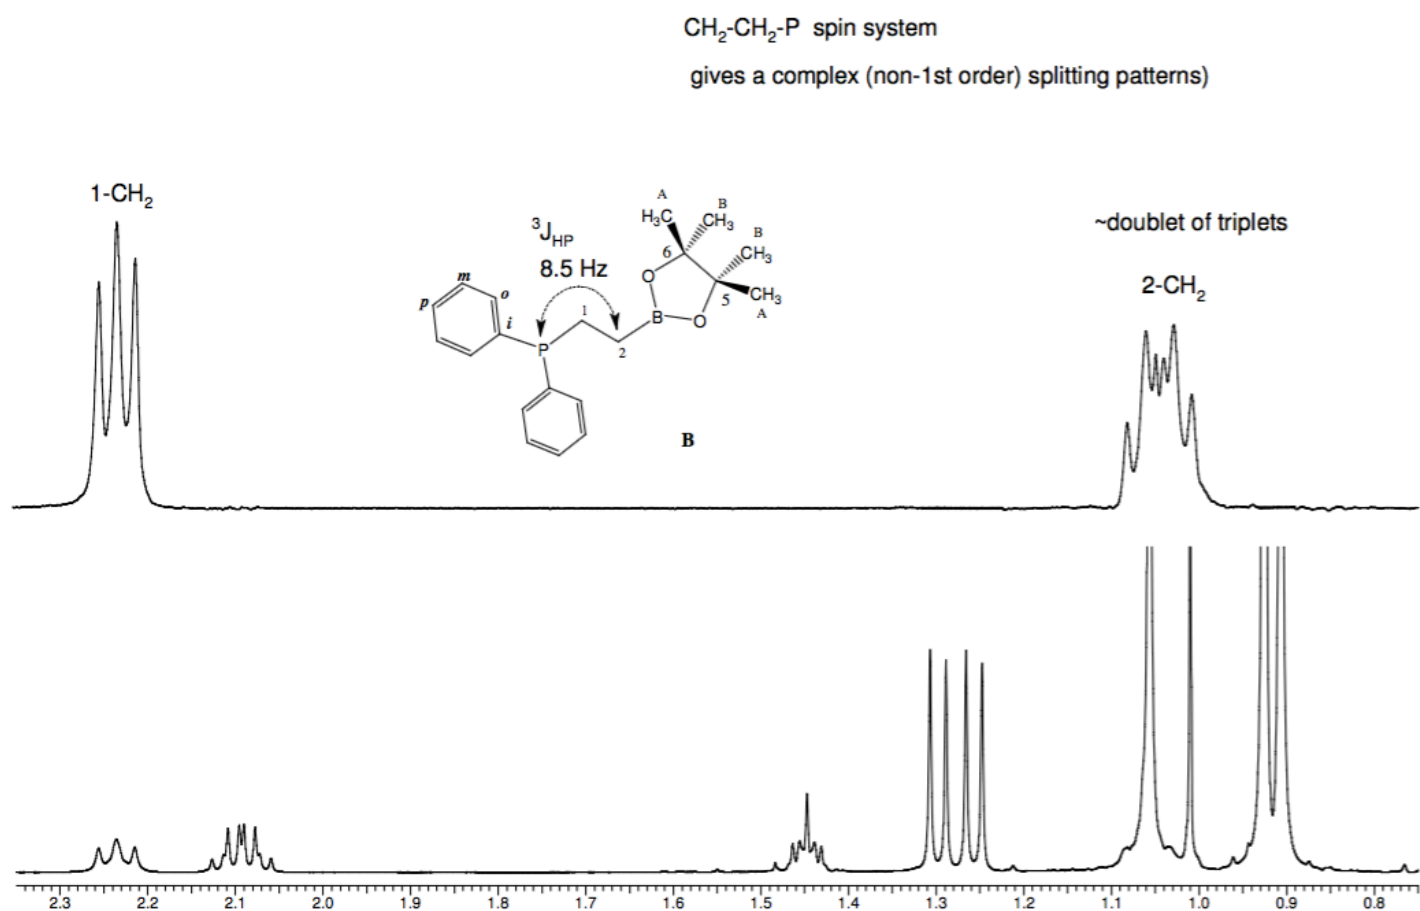

**Fig. S-4.** Crude hydroboration product characterization: 2D gHSQCAD NMR spectrum with structural assignment.

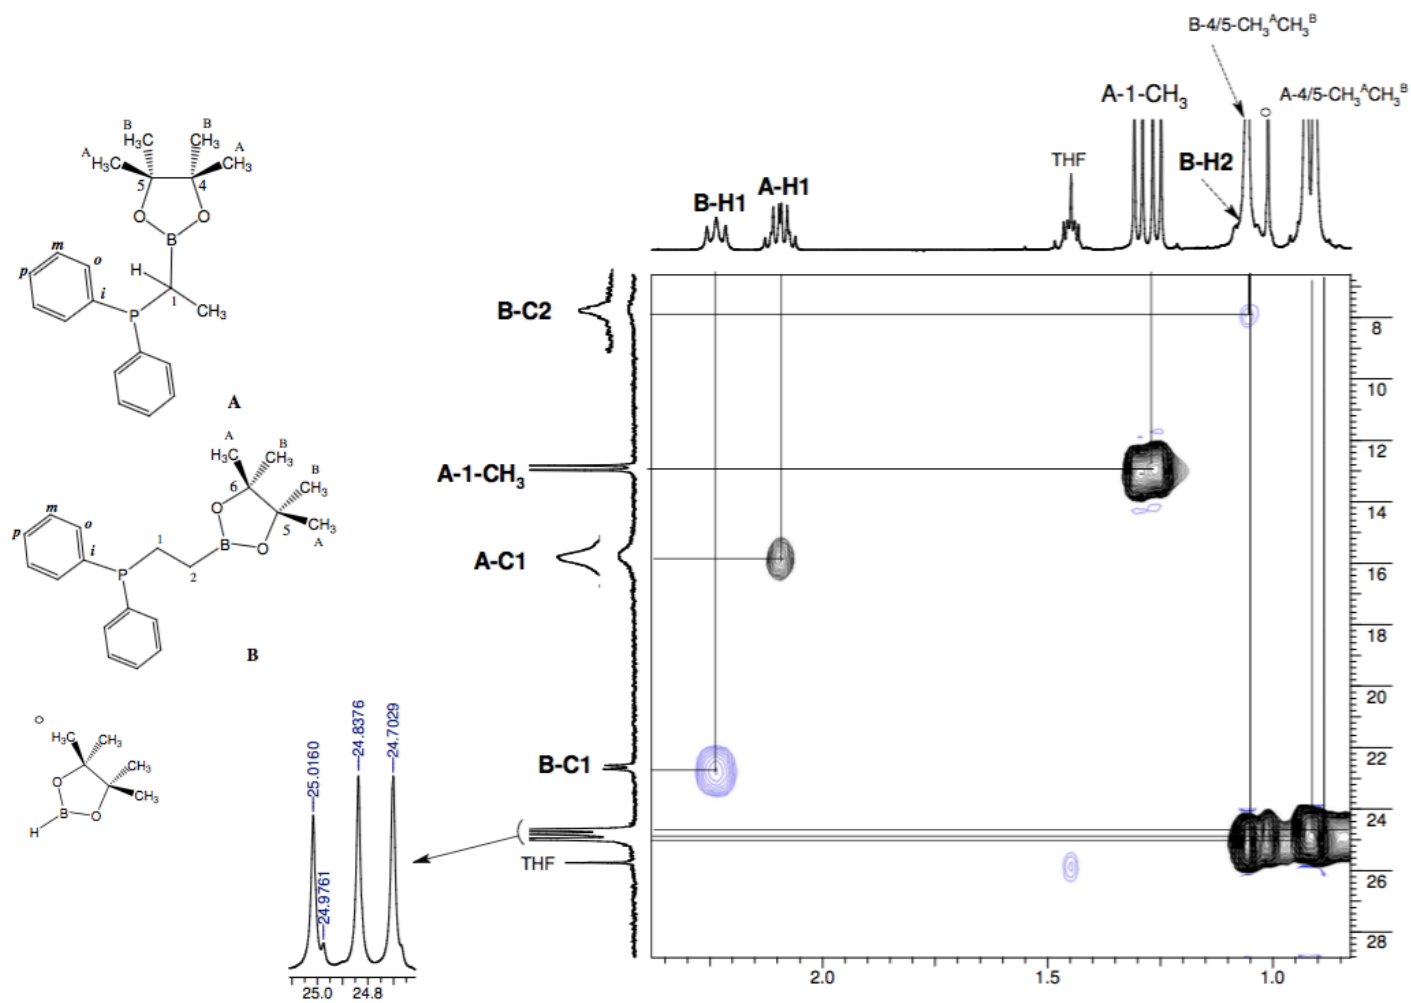

**Fig. S-5.** Crude hydroboration product characterization:  $^{13}\text{C}\{^1\text{H}\}$  NMR spectrum with structural assignment.

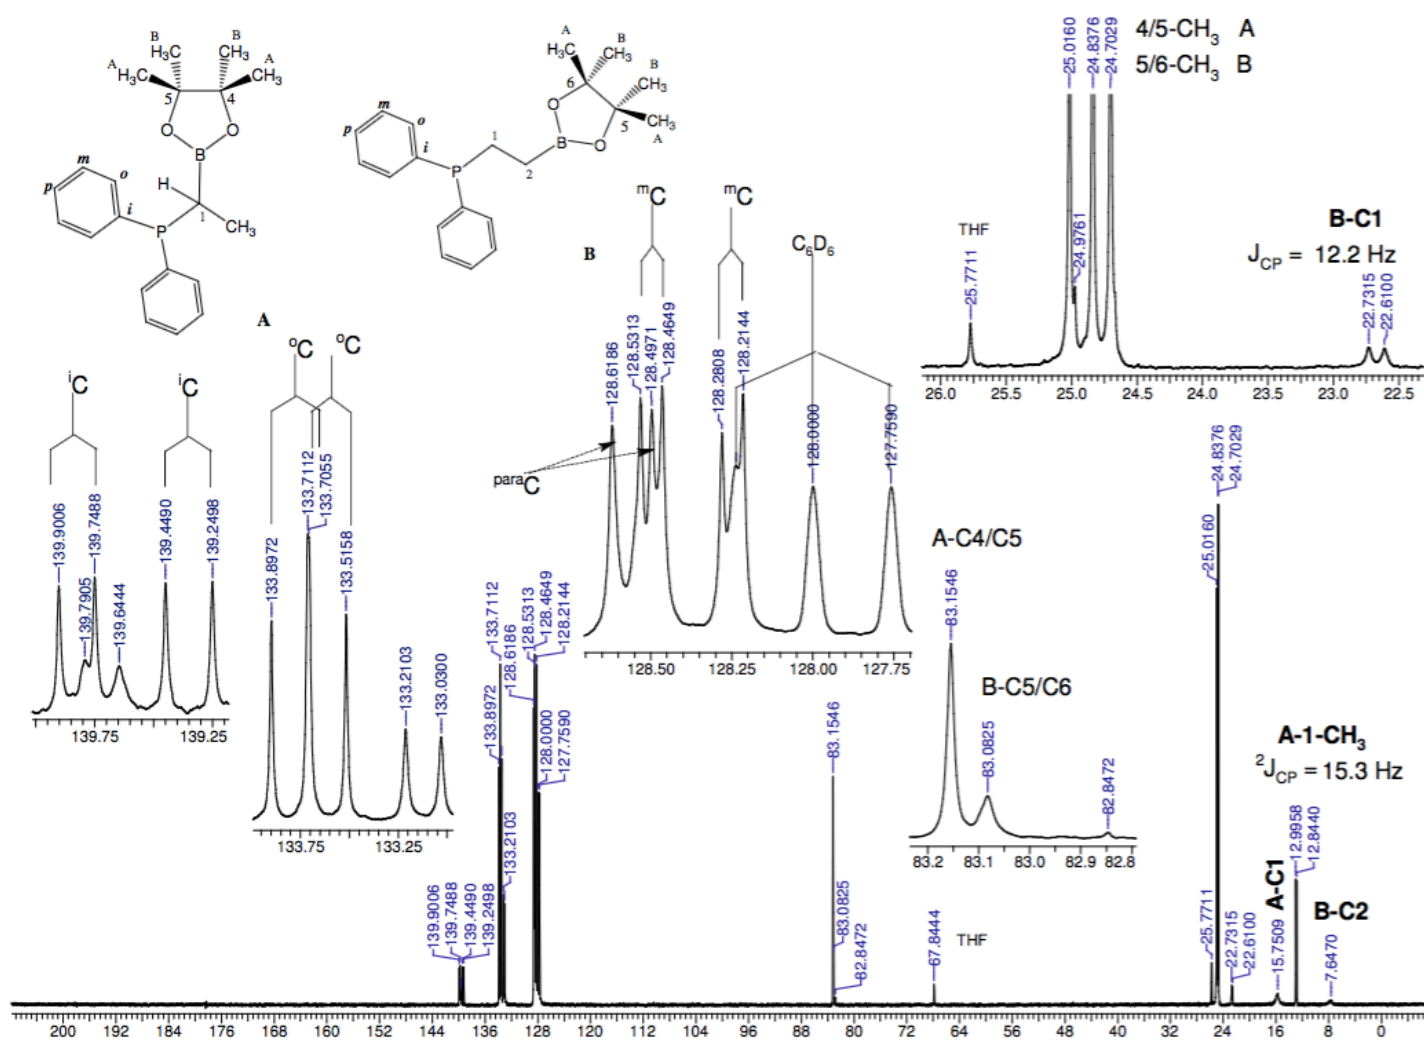

Fig. S-6. Hydroboration reaction parameter screening with pre-catalyst **7**.

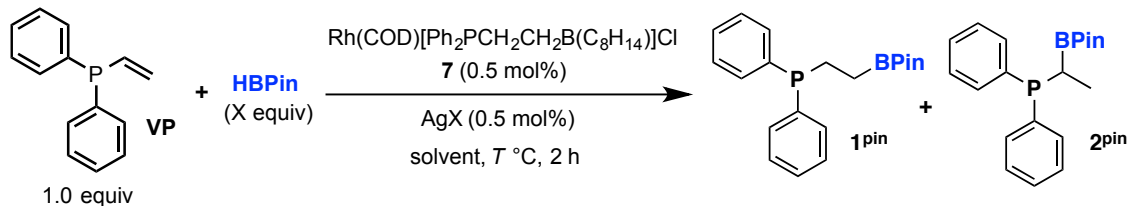

| Entry <sup>a</sup> | Silver Salt        | Yield (%) <sup>b</sup> |          | Convsn (%) <sup>b</sup> |
|--------------------|--------------------|------------------------|----------|-------------------------|
|                    |                    | <b>2</b>               | <b>1</b> | <b>VP</b>               |
| 1                  | None               | 56                     | 43       | 45                      |
| 2                  | AgOTf              | 79                     | 21       | 100                     |
| 3                  | AgBF <sub>4</sub>  | 71                     | 29       | 99                      |
| 4                  | AgSbF <sub>6</sub> | 63                     | 37       | 66                      |

<sup>a</sup> **VP** (100 mM) and HBpin (2 equiv) in THF. Reactions conducted with 0.5 mol% **7** and 0.5 mol% **catalytic Ag additive** at 25 °C. <sup>b</sup> Yield and conversion were determined by <sup>1</sup>H NMR spectroscopy using 1,3,5-trimethoxybenzene as the internal standard.

| Entry <sup>a</sup> | Solvent | Yield (%) <sup>b</sup> |          | Convsn (%) <sup>b</sup> |
|--------------------|---------|------------------------|----------|-------------------------|
|                    |         | <b>2</b>               | <b>1</b> | <b>VP</b>               |
| 1                  | THF     | 79                     | 21       | 100                     |
| 2                  | DCM     | 58                     | 37       | 20                      |
| 3                  | Toluene | 74                     | 26       | 100                     |

<sup>a</sup> **VP** (100 mM) and HBpin (2 equiv) in **solvent**. Reactions conducted with 0.5 mol% **7** and 0.5 mol% AgOTf at 25 °C. <sup>b</sup> Yield and conversion were determined by <sup>1</sup>H NMR spectroscopy using 1,3,5-trimethoxybenzene as the internal standard.

| Entry <sup>a</sup> | Temp (°C) | Yield (%) <sup>b</sup> |          | Convsn (%) <sup>b</sup> |
|--------------------|-----------|------------------------|----------|-------------------------|
|                    |           | <b>2</b>               | <b>1</b> | <b>VP</b>               |
| 1                  | -78       | 41                     | 59       | 68                      |
| 2                  | 0         | 47                     | 52       | 54                      |
| 3                  | 25        | 78                     | 22       | 100                     |
| 4                  | 60        | 90                     | 10       | 100                     |
| 5                  | 70        | 93                     | 7        | 100                     |

<sup>a</sup> **VP** (100 mM) and HBpin (2 equiv) in THF. Reactions conducted with 0.5 mol% **7** and 0.5 mol% AgOTf at **X** °C. <sup>b</sup> Yield and conversion were determined by <sup>1</sup>H NMR spectroscopy using 1,3,5-trimethoxybenzene as the internal standard.

| Entry <sup>a</sup> | VP:HBPin | Yield (%) <sup>b</sup> |          | Convsn (%) <sup>b</sup> |
|--------------------|----------|------------------------|----------|-------------------------|
|                    |          | <b>2</b>               | <b>1</b> | <b>Limiting Reagent</b> |
| 1                  | 2:1      | 43                     | 57       | 98                      |
| 2                  | 1:1      | 72                     | 28       | 84                      |
| 3                  | 1:2      | 78                     | 22       | 100                     |

<sup>a</sup> **VP** (100 mM) and HBpin (**X equiv**) in THF. Reactions conducted with 0.5 mol% **7** and 0.5 mol% AgOTf at 25 °C. <sup>b</sup> Yield and conversion were determined by <sup>1</sup>H NMR spectroscopy using 1,3,5-trimethoxybenzene as the internal standard.

Representative examples of  $^1\text{H}$  NMR spectra obtained from reactions reported in Table 1 and 2.

**Fig. S-7.** NMR spectra of manuscript Table 1 (Entry 6): 0.5 mol% Rh(COD)PBCl with 2 equivalents of HBCat

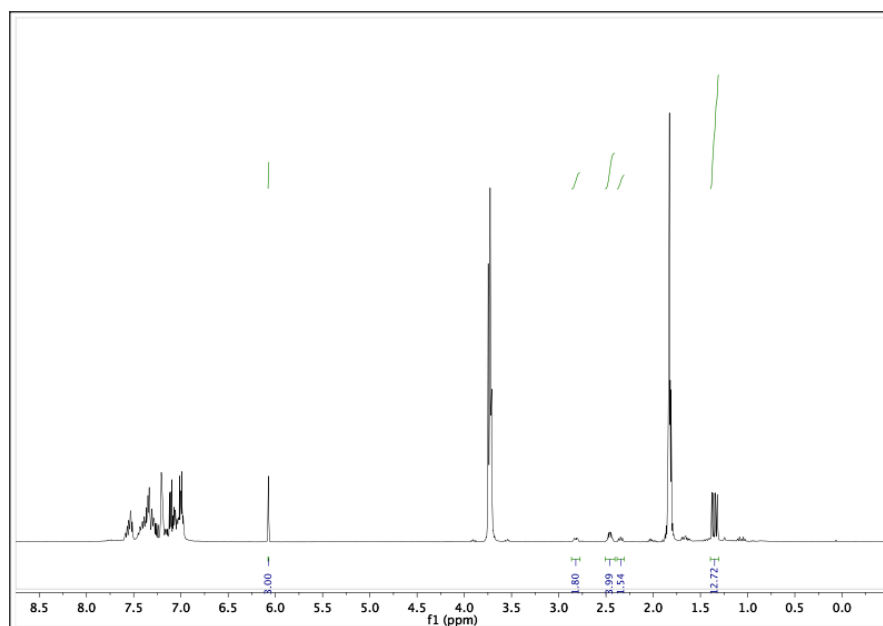

Concentration of 1,3,5-trimethoxybenzene: 0.139 M

Yield of branched product = 59%

Yield of linear product = 11%

Yield of diborane product = 25%

**Fig. S-8.** NMR spectra of manuscript Table 1 (Entry 7): 0.5 mol% Rh(PB)<sub>2</sub>COCl

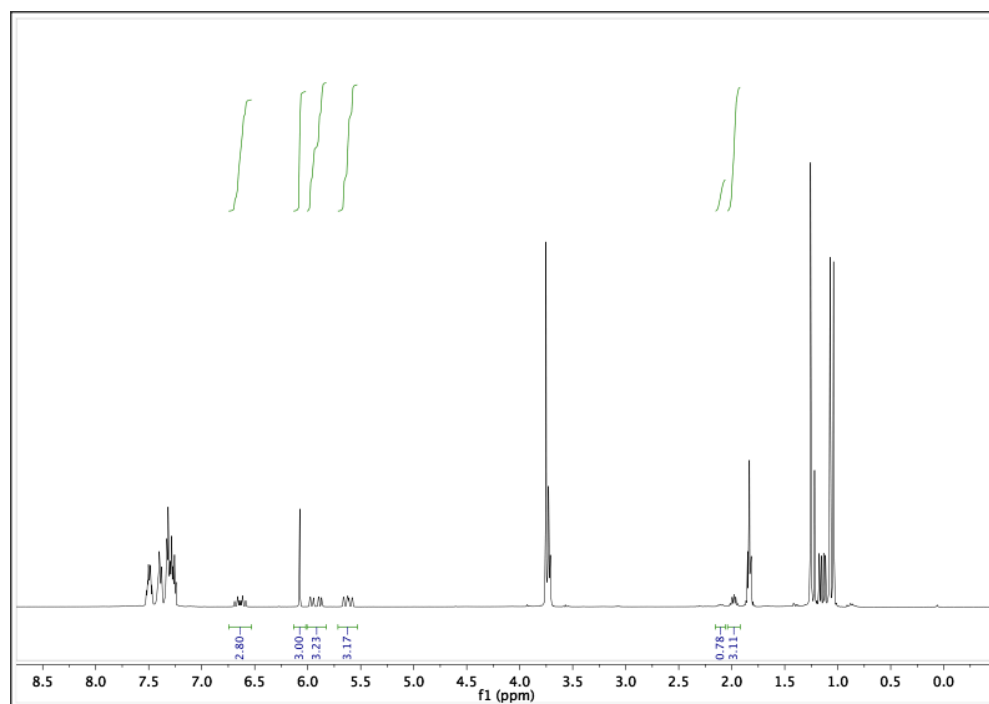

Concentration of 1,3,5-trimethoxybenzene: 0.158 M

Yield of branched product = 52%

Yield of linear product = 6%

Conversion of Alkene = 58%



**Fig. S-9.** NMR spectra of manuscript Table 1 (Entry 8): 0.5 mol% Rh(COD)(PPh<sub>3</sub>)Cl

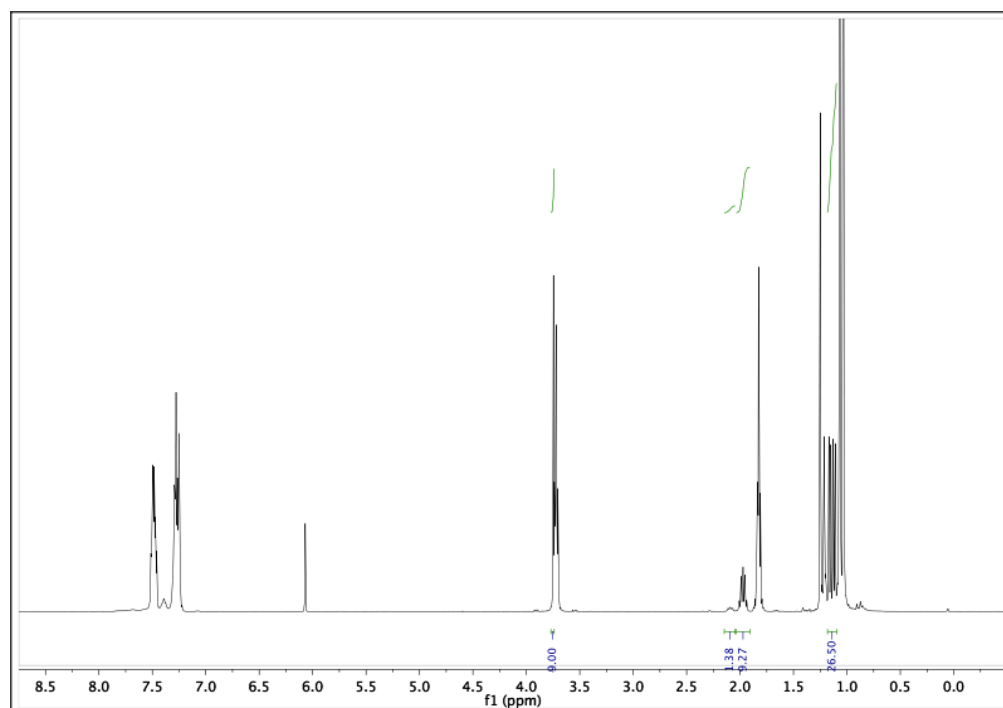

Concentration of 1,3,5-trimethoxybenzene: 0.105 M

Yield of branched product = 92%

Yield of linear product = 7%

**Fig. S-10.** NMR spectra of manuscript Table 2 (Entry 1): 0.5 mol% [Rh(COD)Cl]<sub>2</sub>

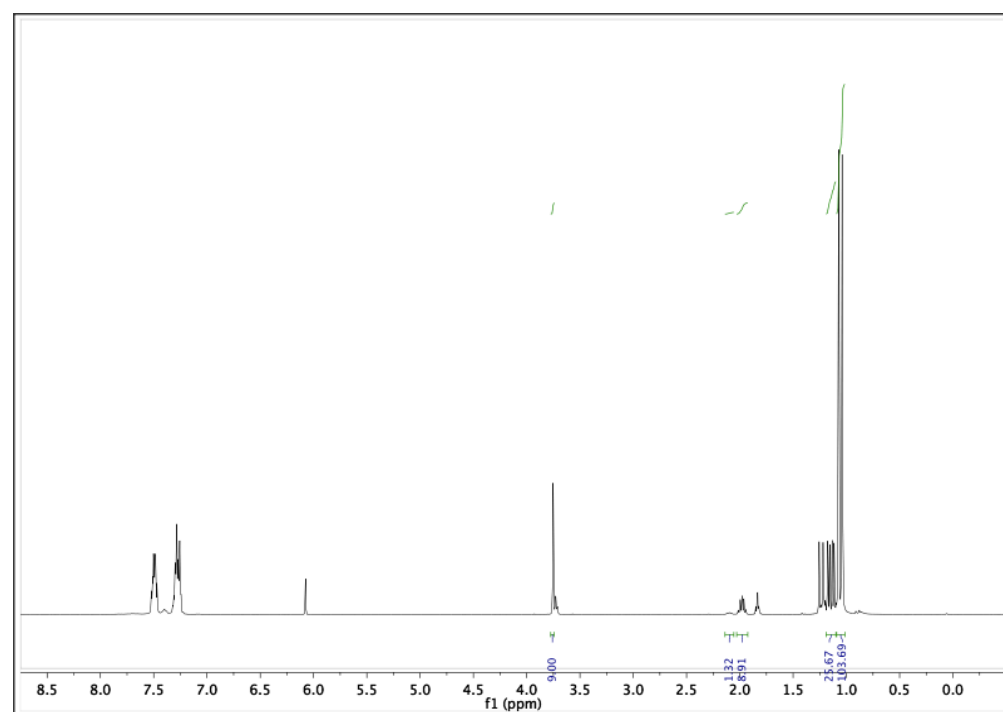

Concentration of 1,3,5-trimethoxybenzene: 0.105 M

Yield of branched product = 93%

Yield of linear product = 7%

Fig. S-11. NMR spectra of manuscript Table 2 (Entry 5): 0.5 mol% RhCl<sub>3</sub>

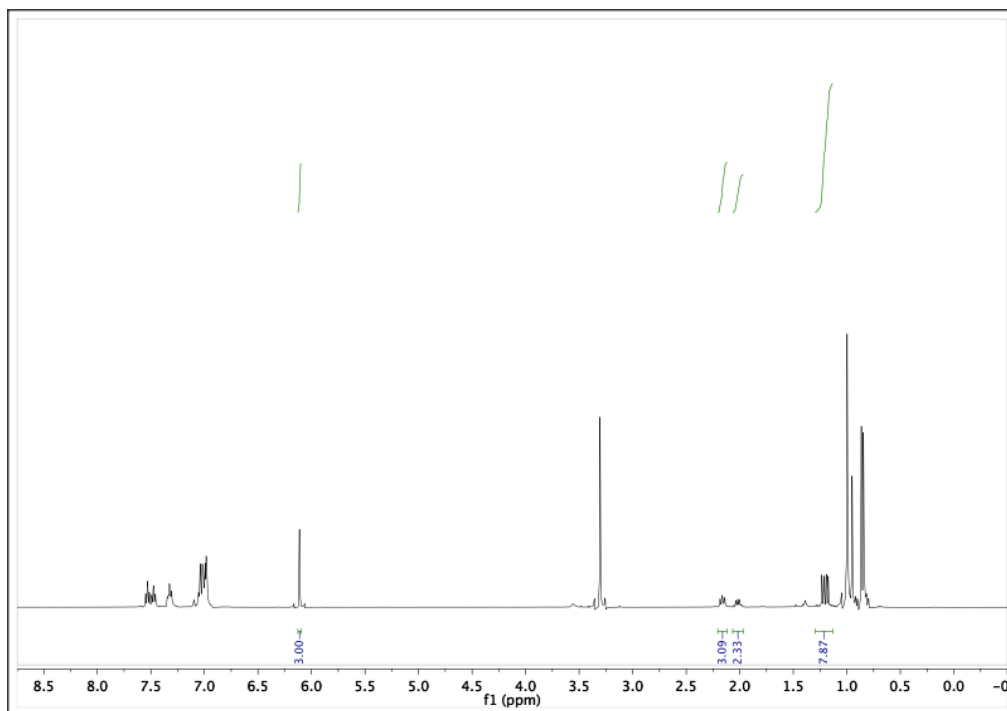

1,3,5-trimethoxybenzene: 43 mg  
Ratio of vinylphosphine to 1,3,5-trimethoxybenzene = 0.255  
Yield of branched product = 60%  
Yield of linear product = 40%

Fig. S-12. NMR spectra of manuscript Table 2 (Entry 6): 0.5 mol% [Rh(COE)<sub>2</sub>Cl]<sub>2</sub>

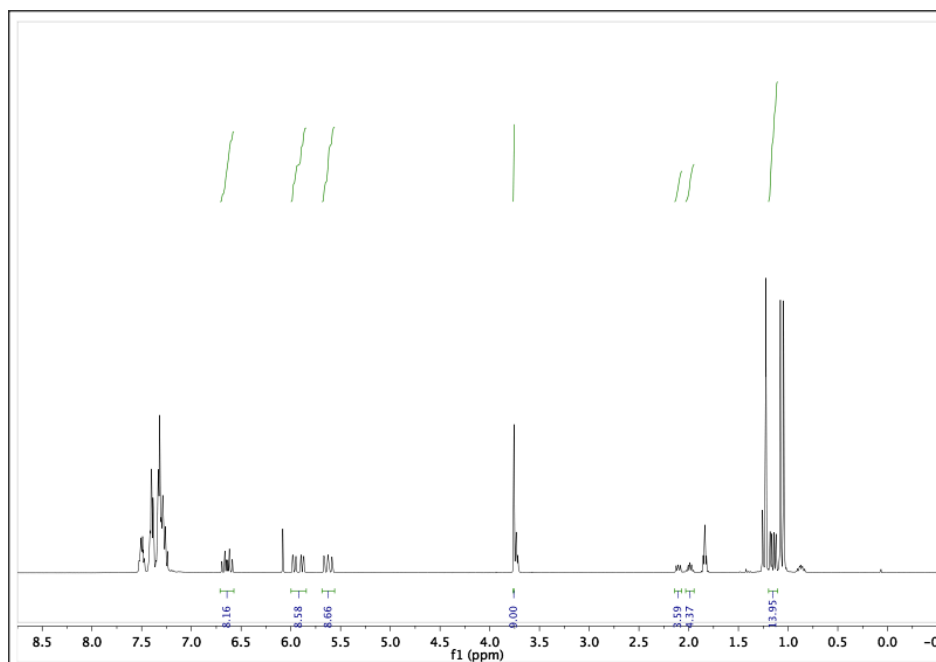

Concentration of 1,3,5-trimethoxybenzene: 0.0705 M  
Yield of branched product = 31%  
Yield of linear product = 12%  
Conversion of Alkene = 58%

**Fig. S-13.** NMR spectra of manuscript Table 2 (Entry 7): 0.5 mol%  $[\text{Rh}(\text{PPh}_3)_2\text{Cl}]_2$

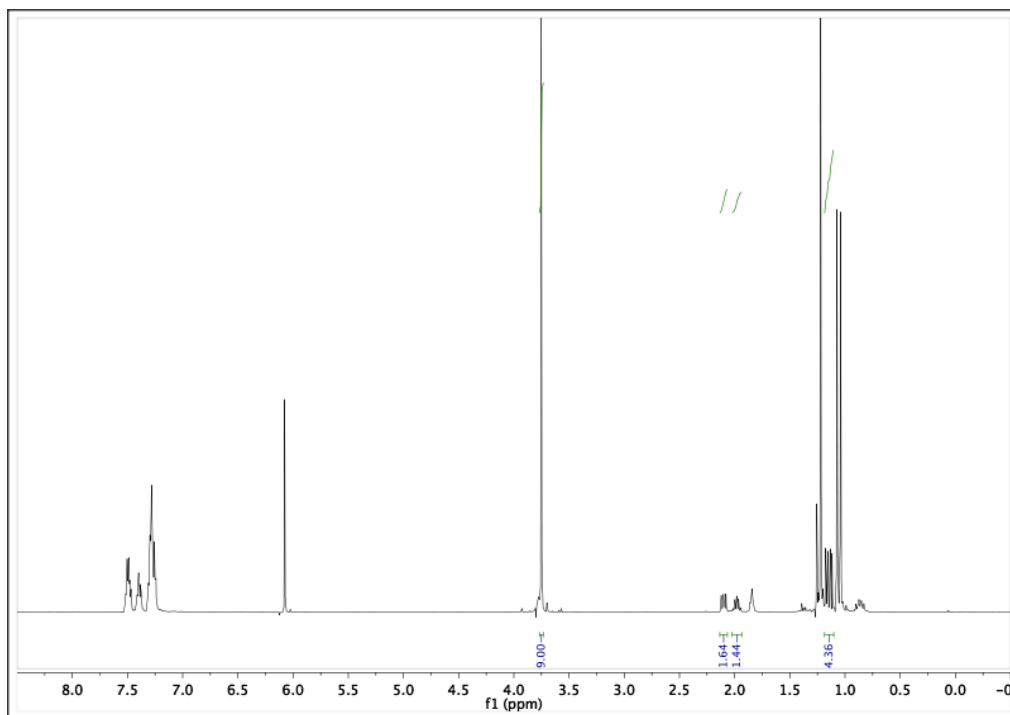

1,3,5-trimethoxybenzene: 43 mg  
Ratio of vinylphosphine to 1,3,5-trimethoxybenzene = 0.42  
Yield of branched product = 62%  
Yield of linear product = 35%

**Fig. S-14.** NMR spectra of manuscript Table 2 (Entry 8): 0.5 mol%  $\text{Rh}(\text{PPh}_3)_3\text{Cl}$

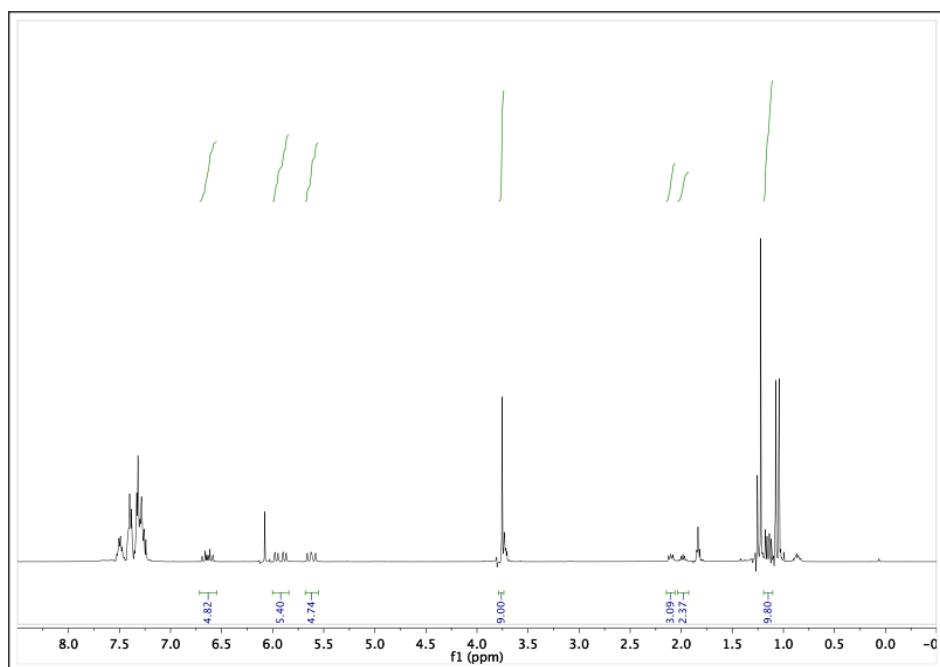

Concentration of 1,3,5-trimethoxybenzene: 0.115 M  
Yield of branched product = 27%  
Yield of linear product = 17%  
Conversion of Alkene = 46%

**Fig. S-15.** Isolated product characterization:  $^1\text{H}\{^{13}\text{C}\}$  NMR spectrum of Rh complex **9**.

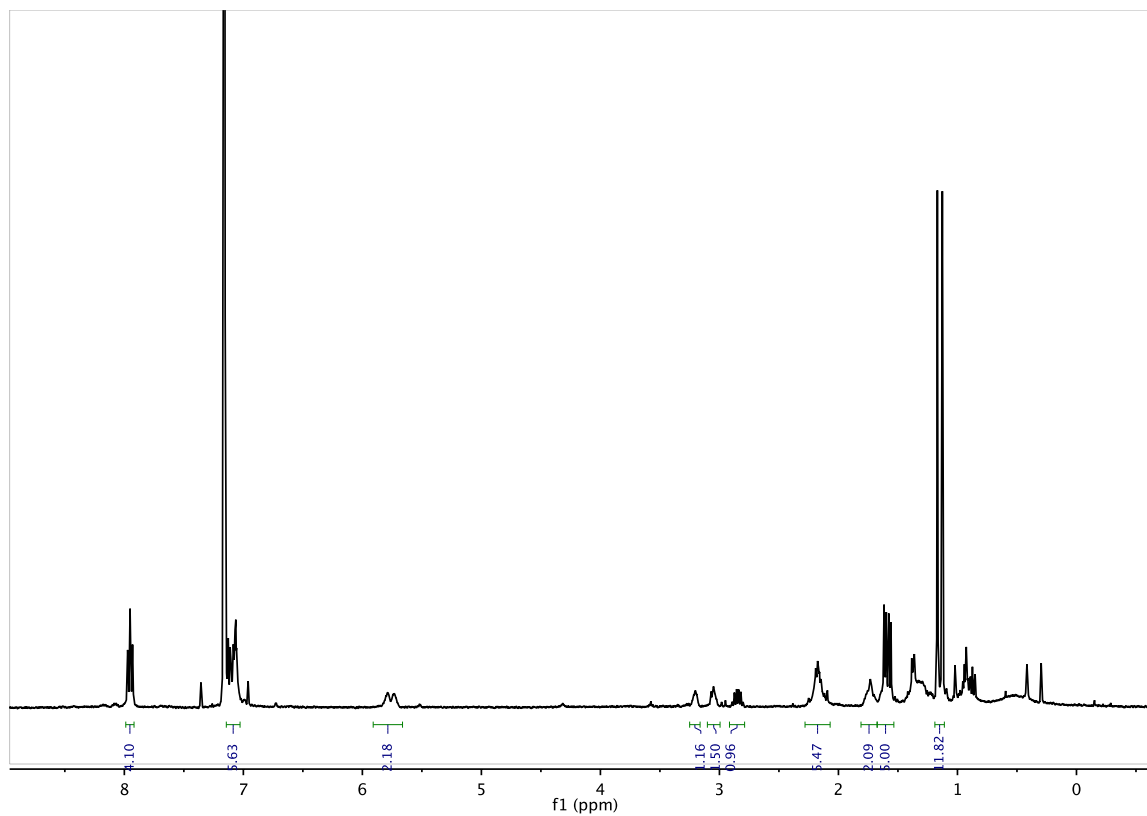

**Fig. S-16.** Isolated product characterization:  $^{31}\text{P}\{^1\text{H}\}$  NMR spectrum of Rh complex **9**.

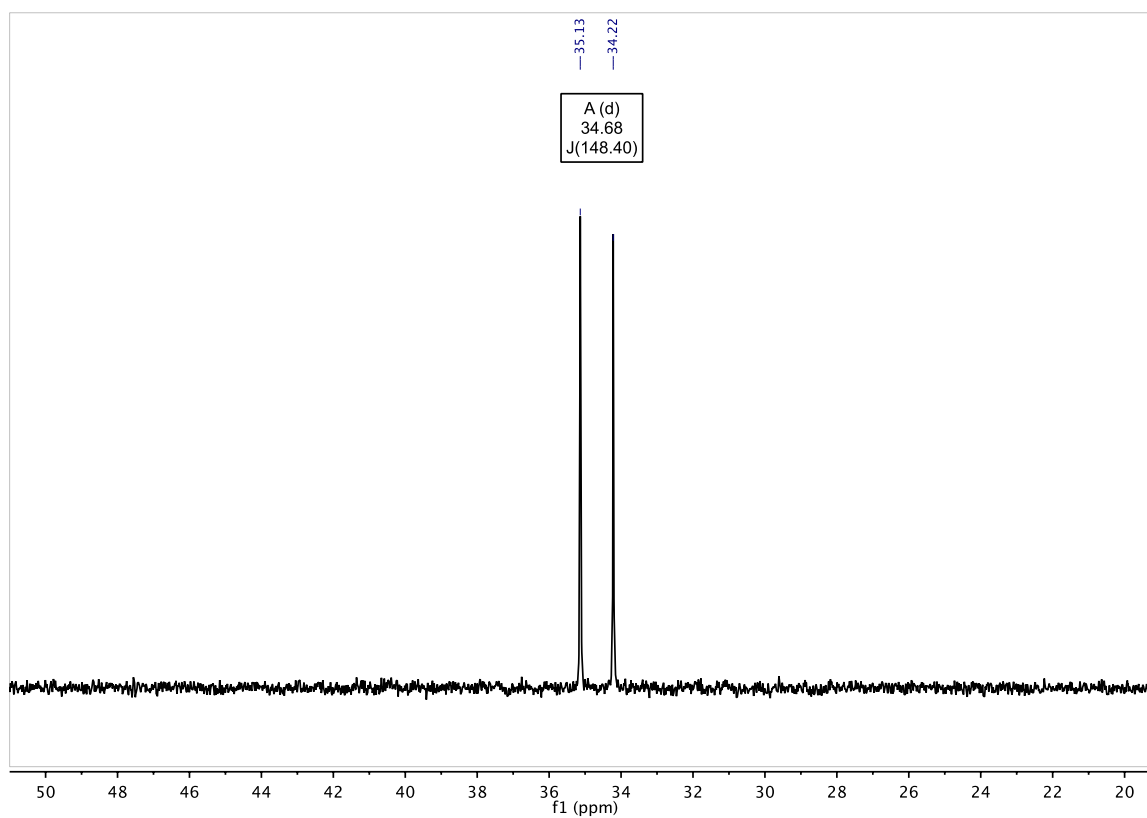

Fig. S-17. Isolated product characterization:  $^{11}\text{B}\{^1\text{H}\}$  NMR spectrum of Rh complex **9**.

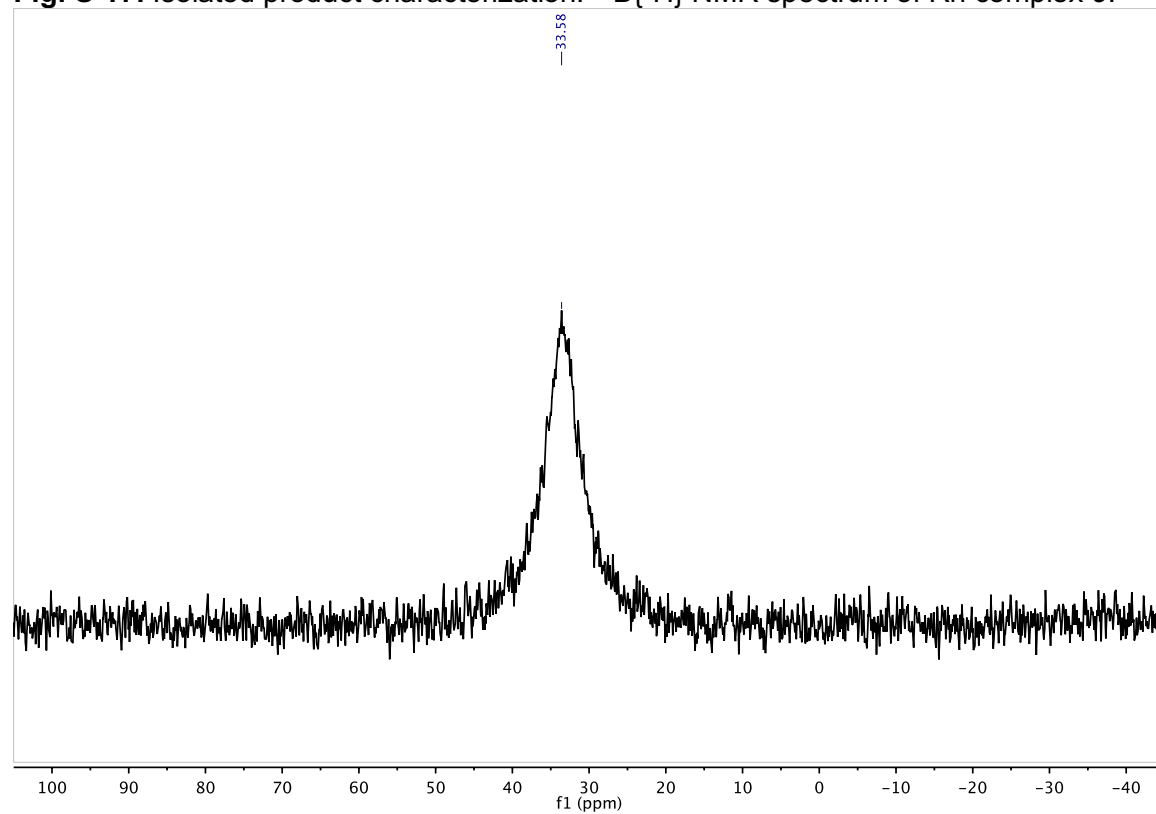

Fig. S-18. Isolated product characterization:  $^{13}\text{C}\{^1\text{H}\}$  NMR spectrum of Rh complex **9**.

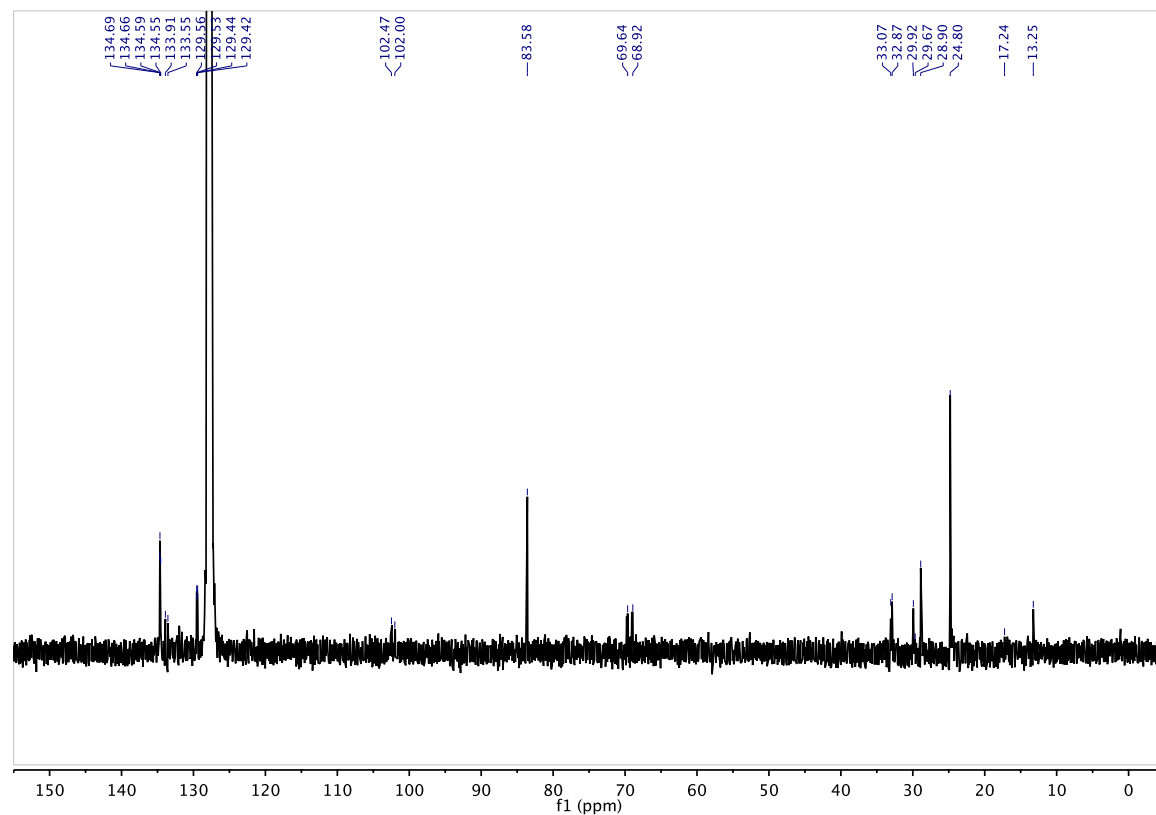

**Fig. S-19.** Crude product characterization:  $^1\text{H}\{^{13}\text{C}\}$  NMR spectrum of protected phosphines **10** and **11**.

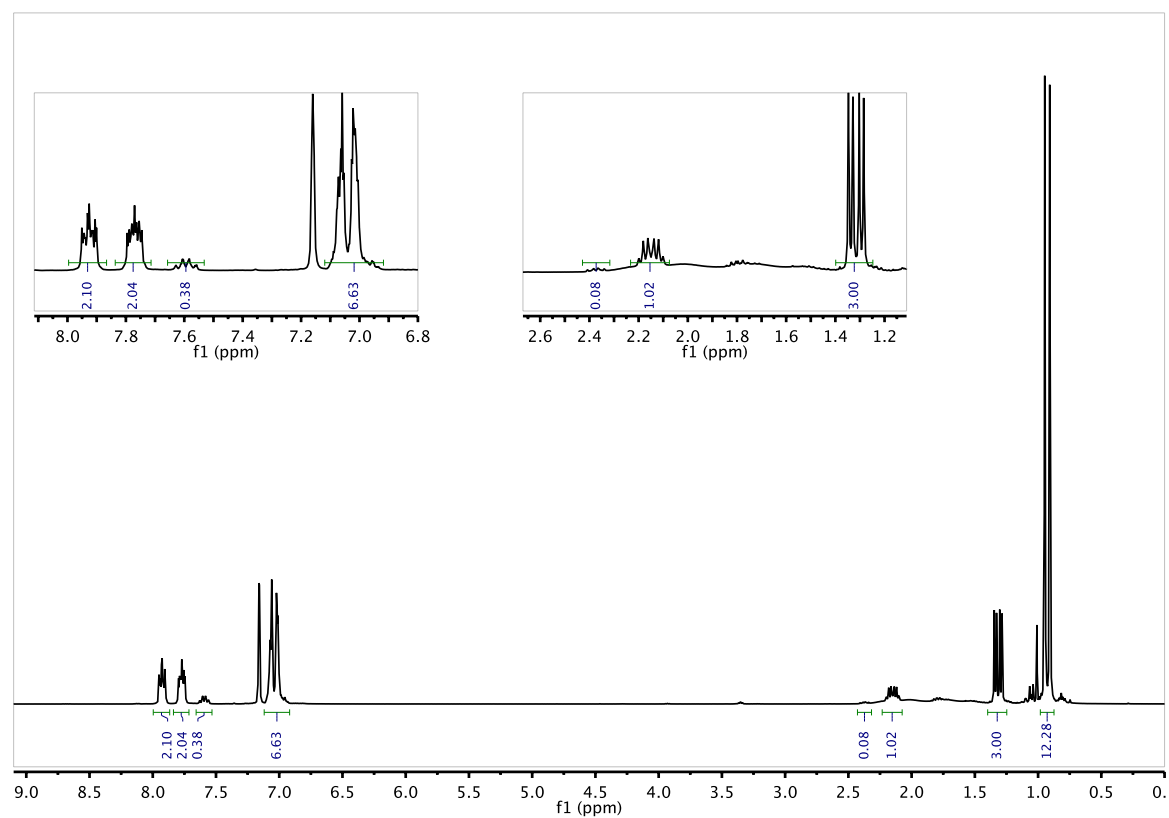

**Fig. S-20.** Crude product characterization:  $^{31}\text{P}\{^1\text{H}\}$  NMR spectrum of protected phosphines **10** and **11**.

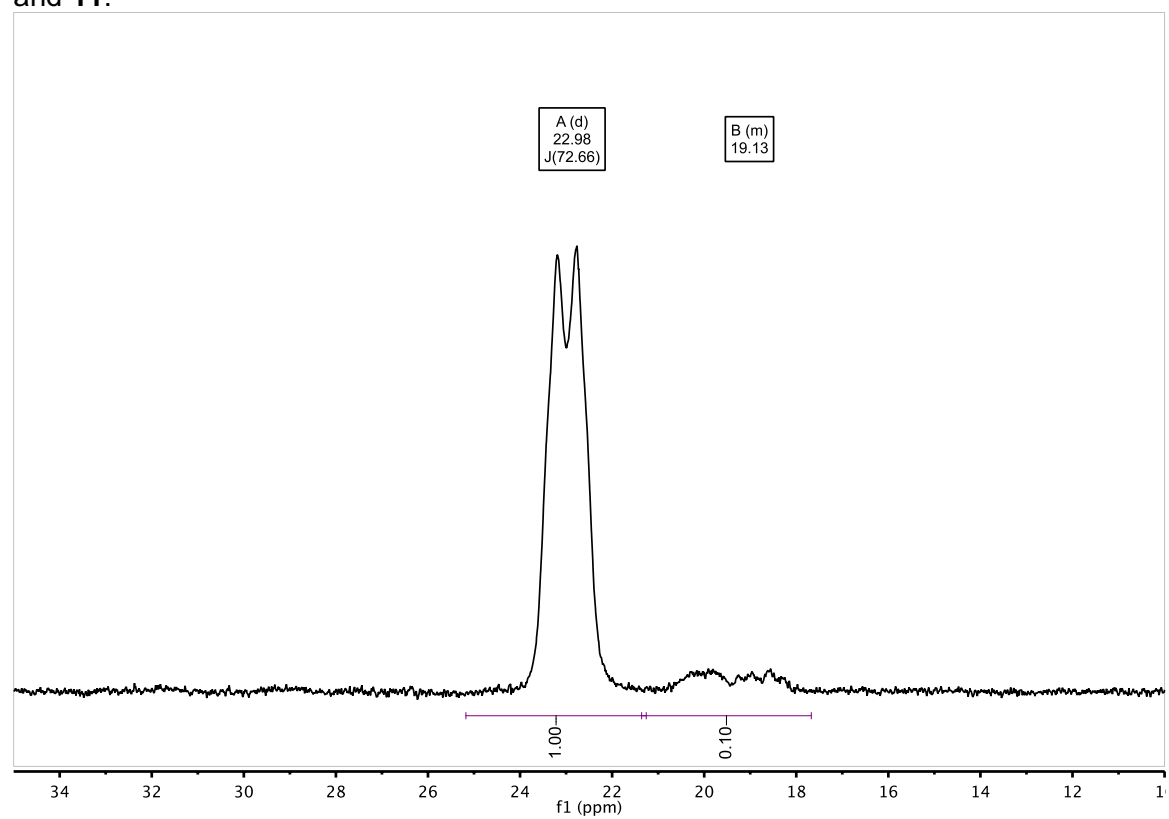

**Fig. S-21.** Crude product characterization:  $^{11}\text{B}\{^1\text{H}\}$  NMR spectrum of protected phosphines **10** and **11**.

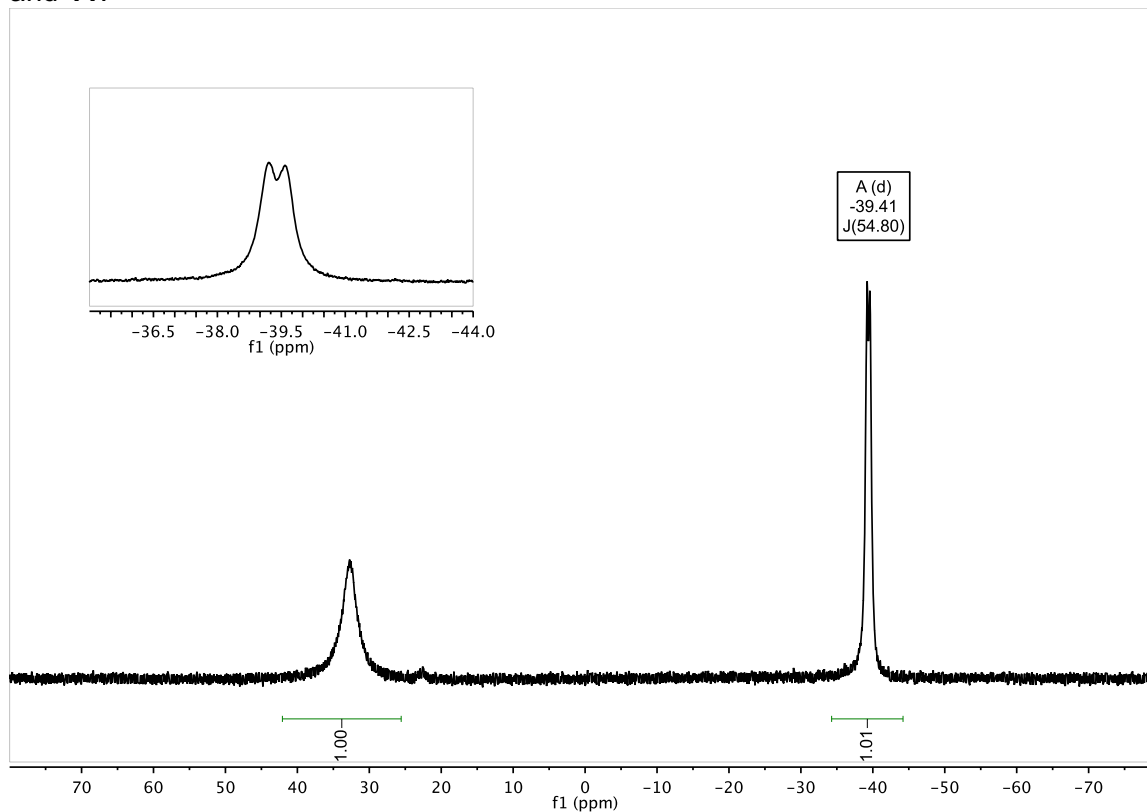

**Fig. S-22.** Crude product characterization:  $^{11}\text{B}$  NMR spectrum of protected phosphines **10** and **11**.

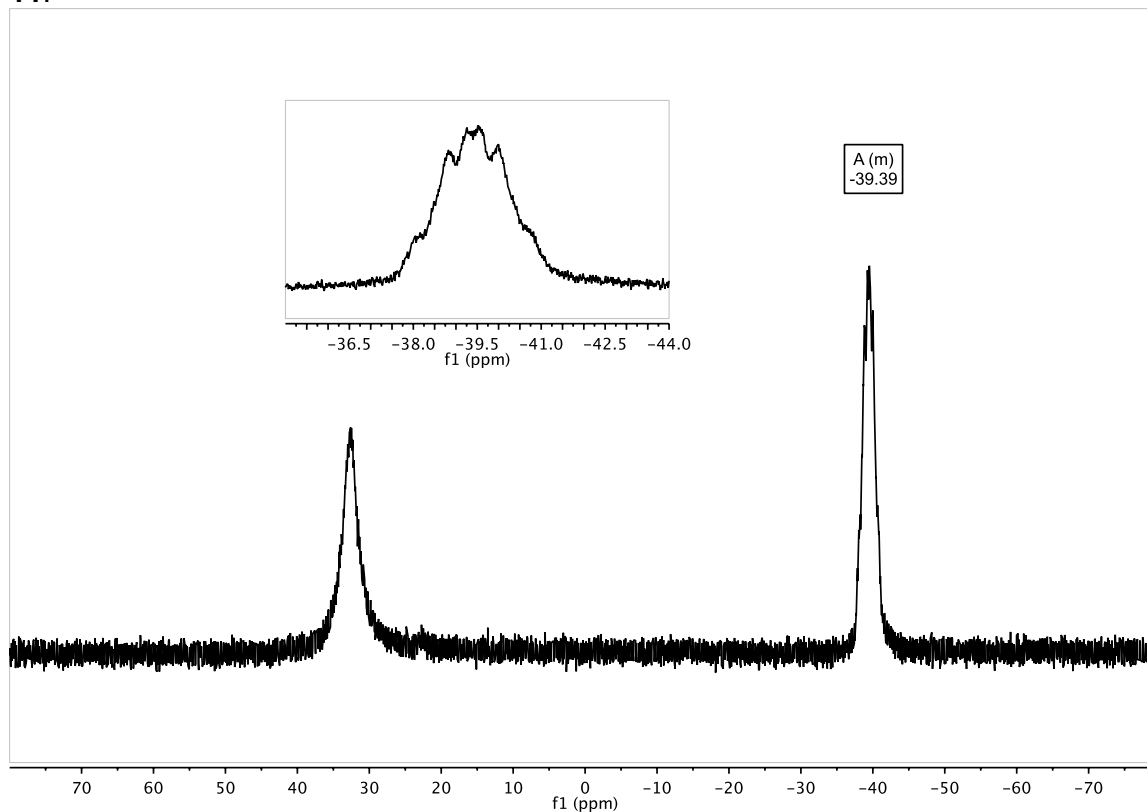

**Fig. S-23.** Crude product characterization:  $^{13}\text{C}\{^1\text{H}\}$  NMR spectrum of protected phosphines **10** and **11**.

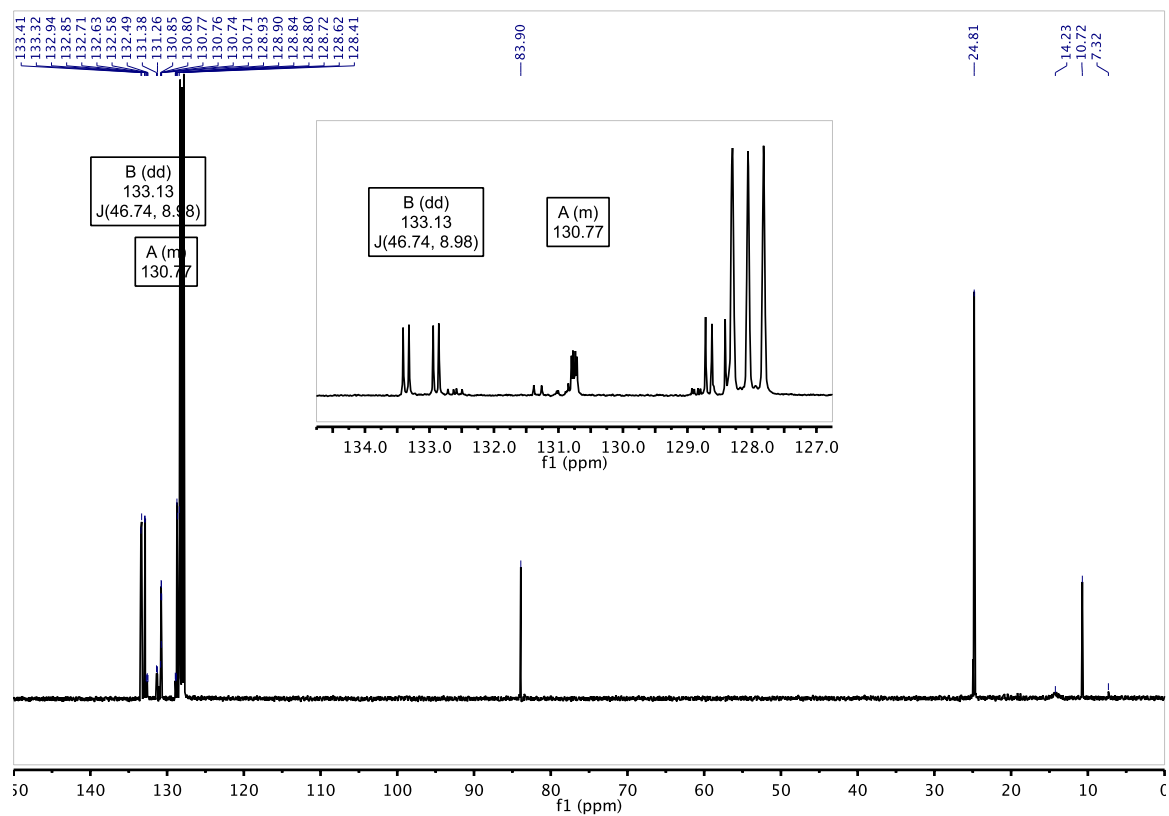

**Fig. S-24.** Isolated product characterization:  $^1\text{H}\{^{13}\text{C}\}$  NMR spectrum of protected potassium trifluoroborate salt **12**.

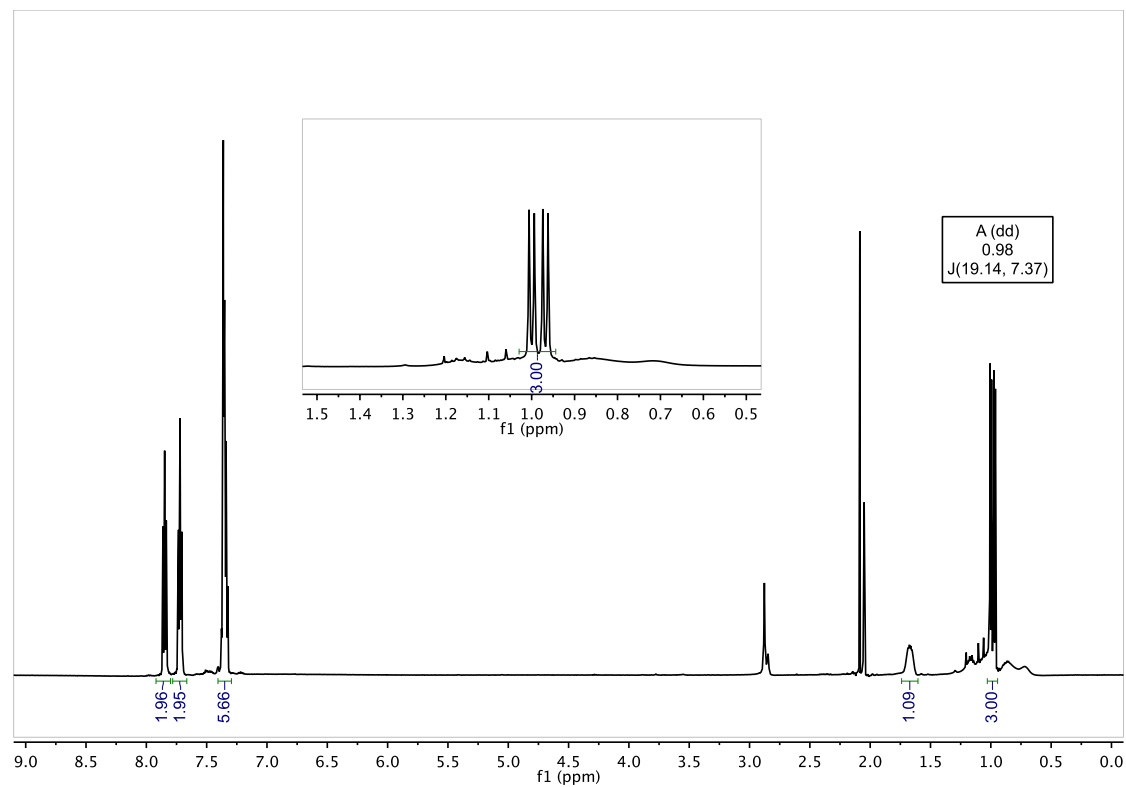



**Fig. S-25.** Isolated product characterization:  $^{31}\text{P}\{^1\text{H}\}$  NMR spectrum of protected potassium trifluoroborate salt **12**.

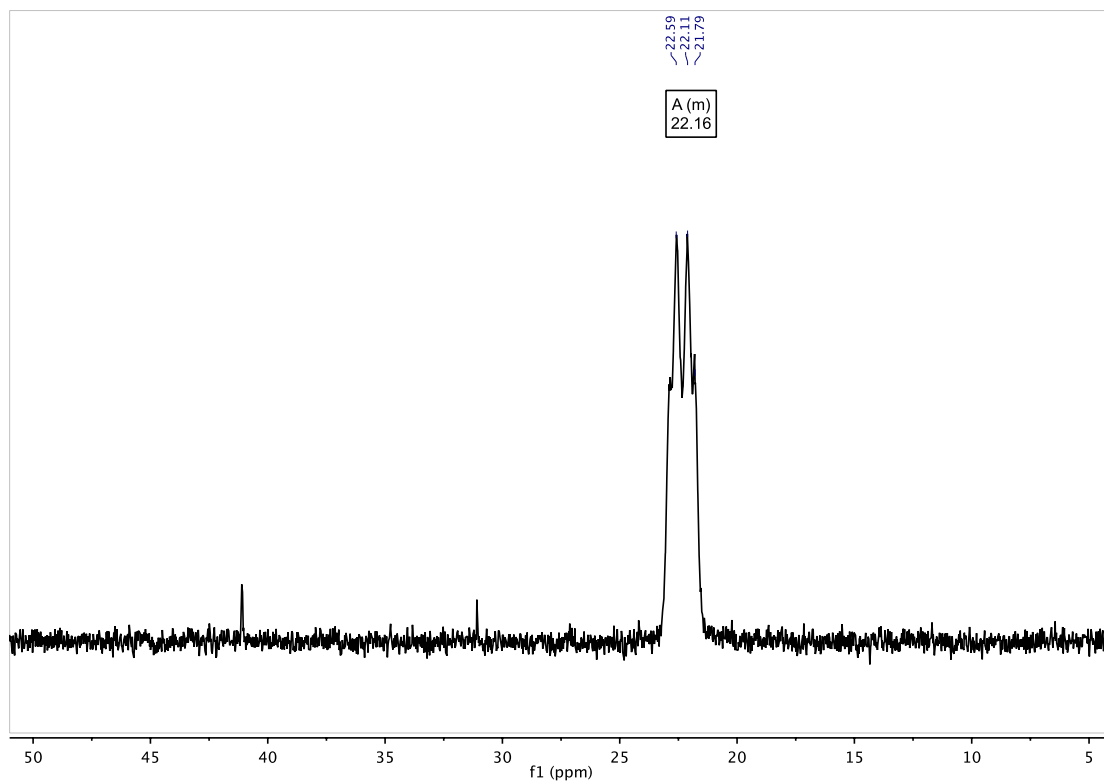

**Fig. S-26.** Isolated product characterization:  $^{31}\text{P}$  NMR spectrum of protected potassium trifluoroborate salt **12**.

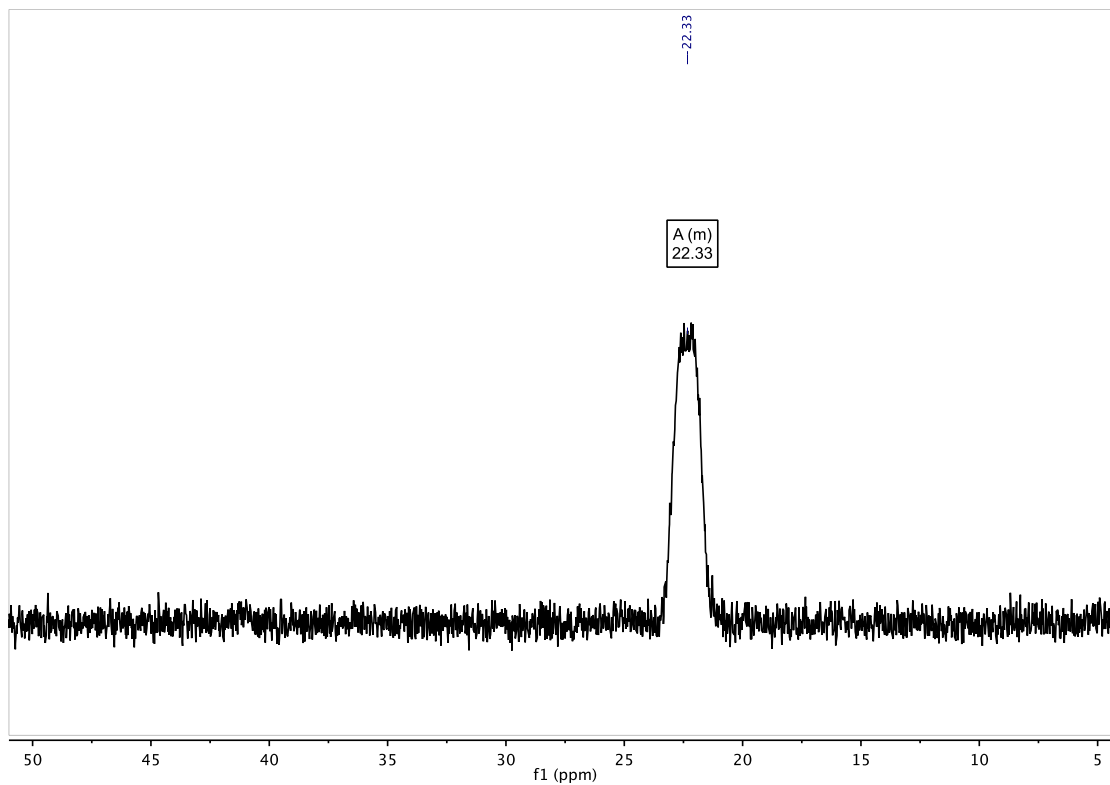

**Fig. S-27.** Isolated product characterization:  $^{11}\text{B}\{^1\text{H}\}$  NMR spectrum of protected potassium trifluoroborate salt **12**.

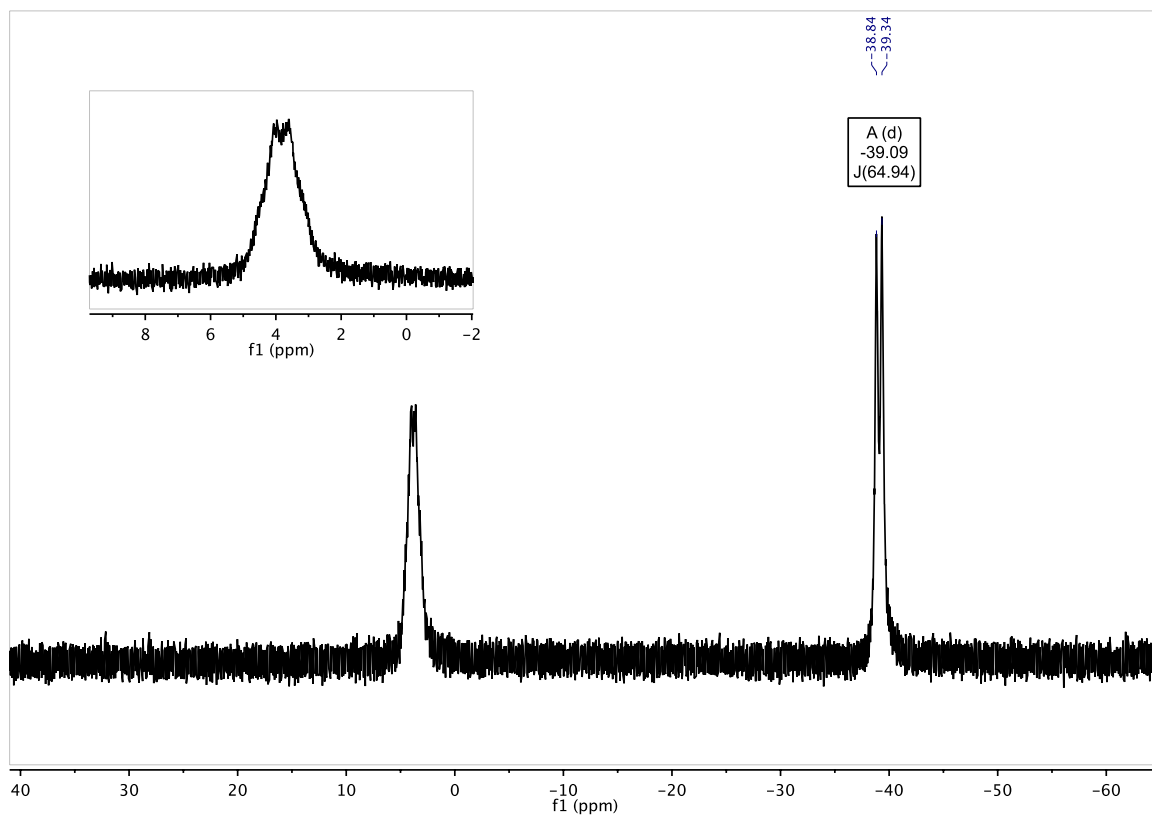

**Fig. S-28.** Isolated product characterization:  $^{11}\text{B}$  NMR spectrum of protected potassium trifluoroborate salt **12**.

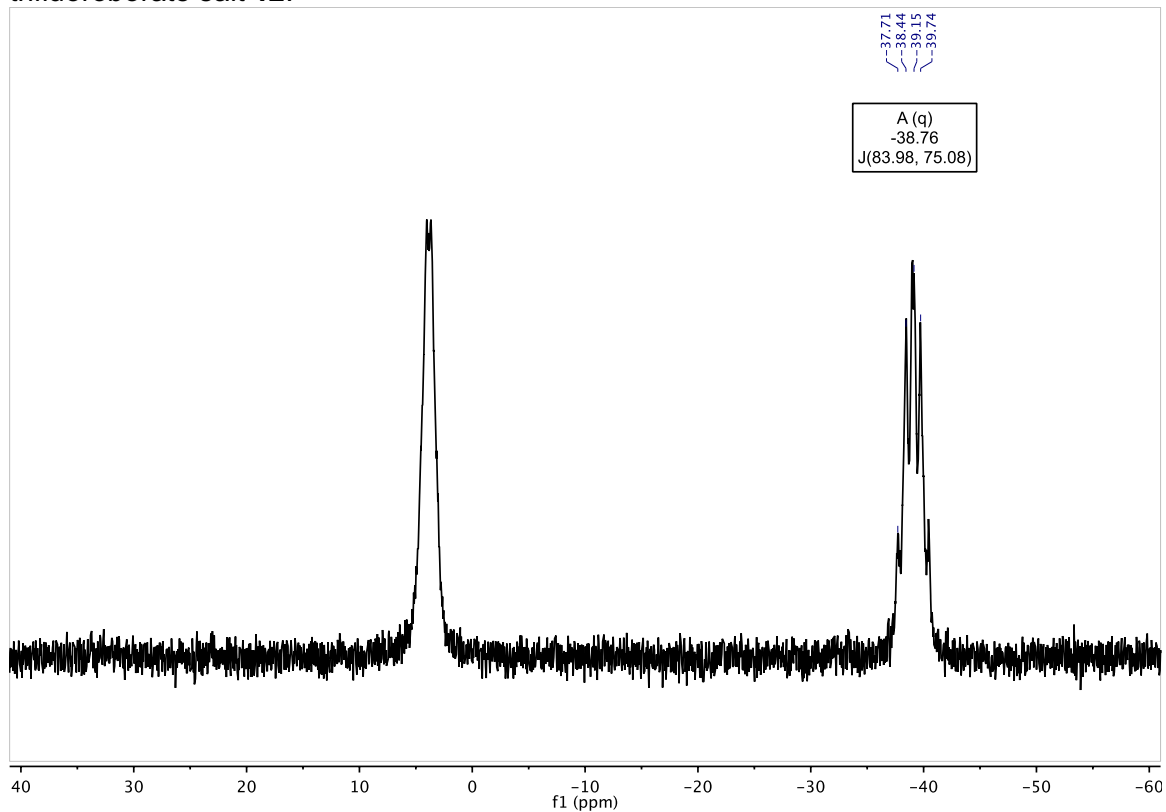

**Fig. S-29.** Isolated product characterization:  $^{19}\text{F}\{^{13}\text{C}\}$  NMR spectrum of protected potassium trifluoroborate salt **12**.

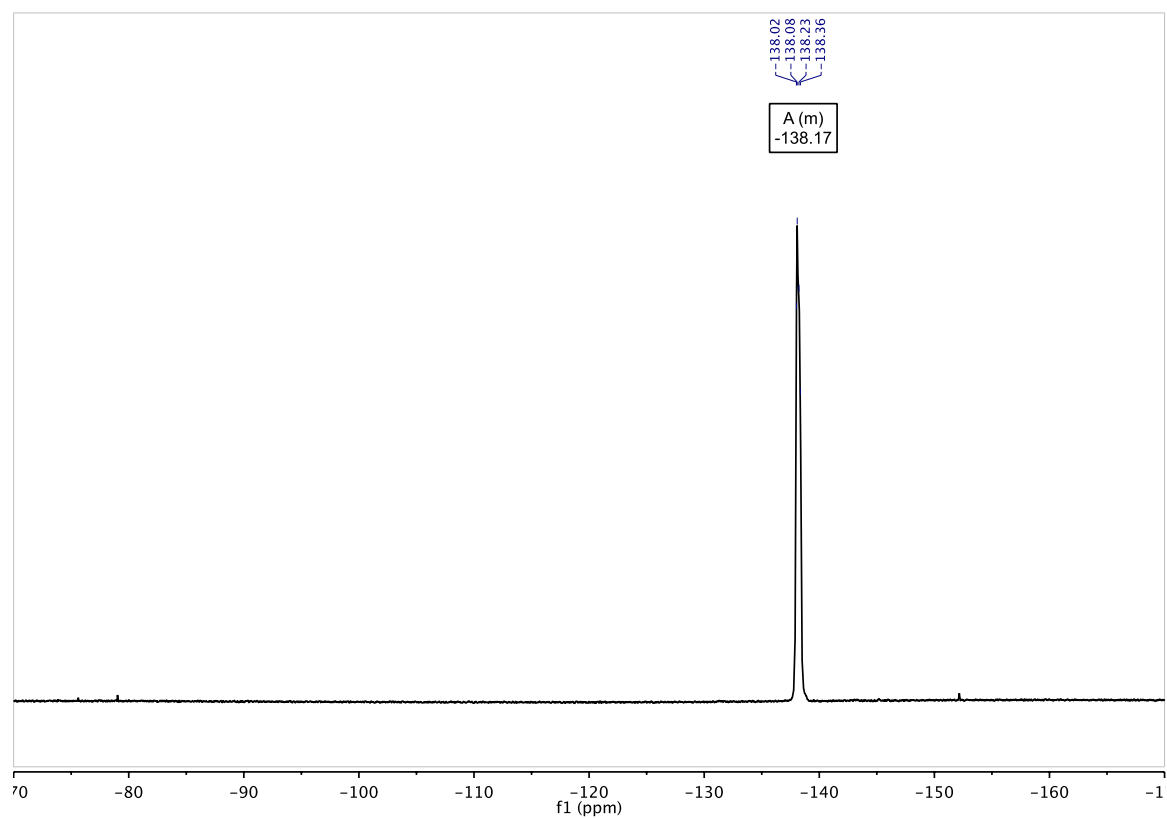

**Fig. S-30.** Isolated product characterization:  $^{13}\text{C}\{^1\text{H}\}$  NMR spectrum of protected potassium trifluoroborate salt **12**.

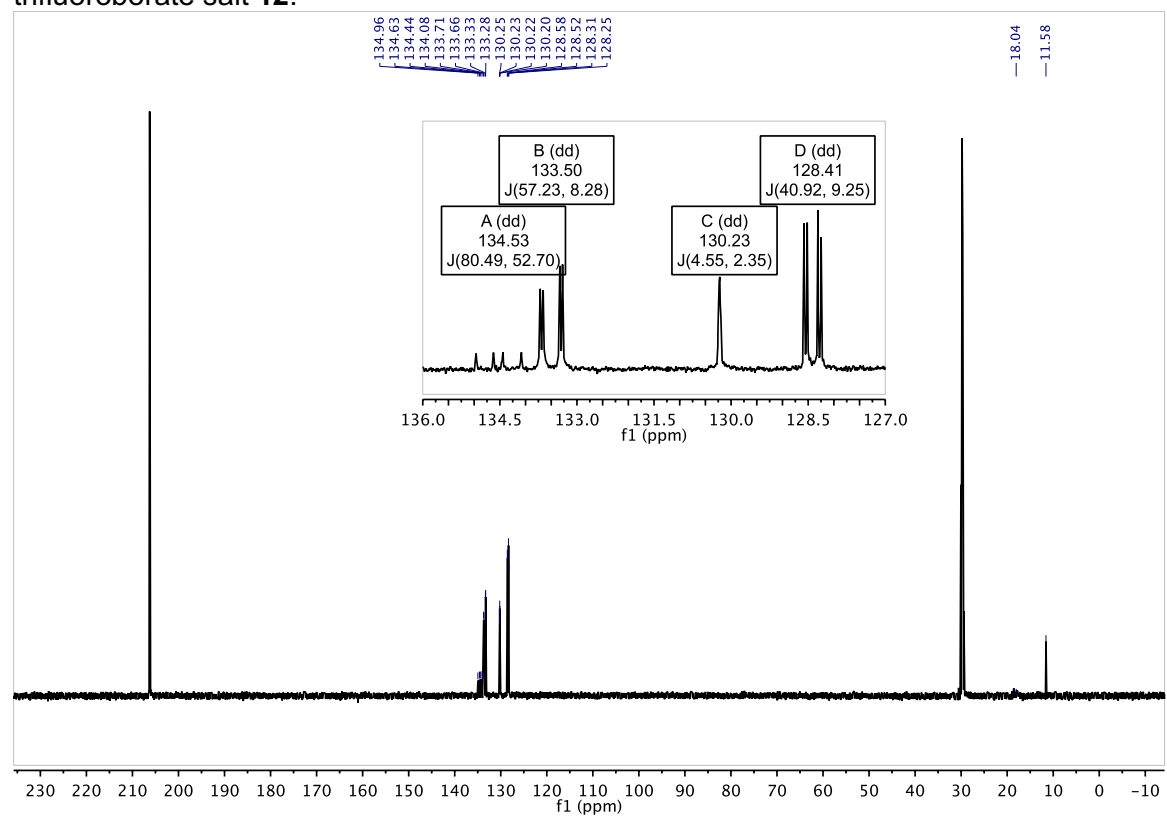

ORTEP Representation and X-ray Crystallographic Structure Data for Compound 7

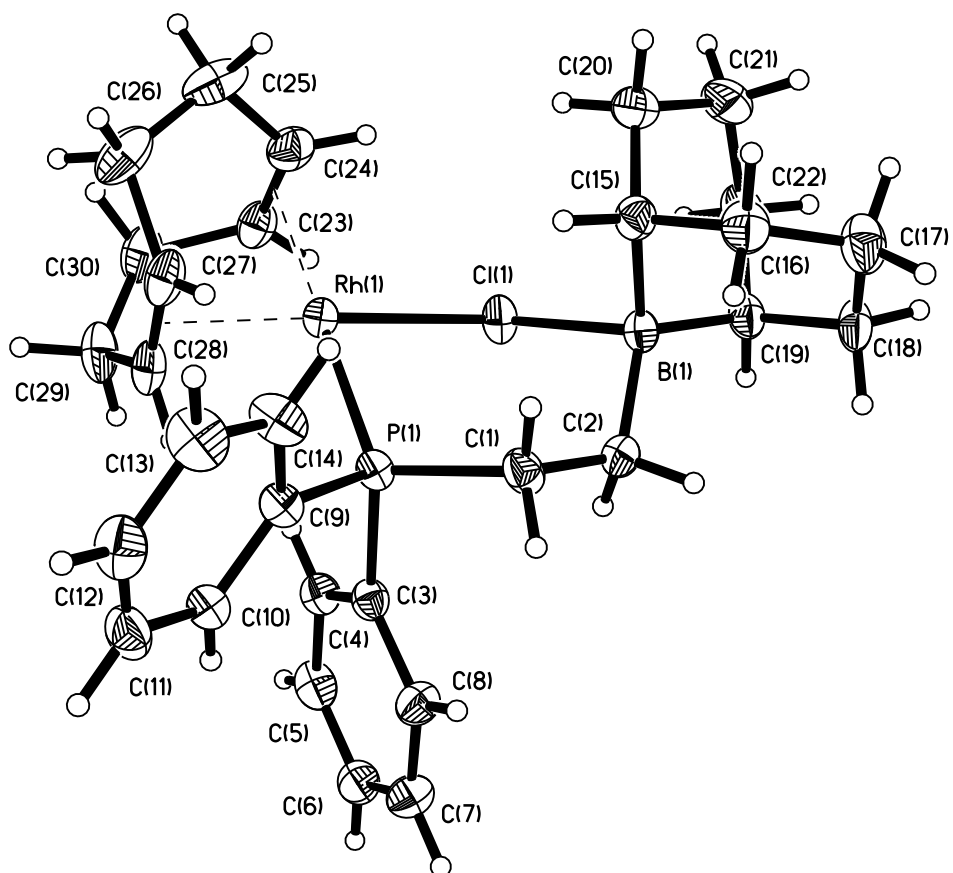

**Figure S-31.** Perspective view of the molecular structure of RhCl(COD)[PPh<sub>2</sub>CH<sub>2</sub>CH<sub>2</sub>B(C<sub>8</sub>H<sub>14</sub>)] with the atom labeling scheme for the independent non-hydrogen atoms. The thermal ellipsoids are scaled to enclosed 30% probability.

### Description of the X-ray Structural Analysis of RhCl(COD)[PPh<sub>2</sub>CH<sub>2</sub>CH<sub>2</sub>B(C<sub>8</sub>H<sub>14</sub>)]

A yellow crystal of RhCl(COD)[PPh<sub>2</sub>CH<sub>2</sub>CH<sub>2</sub>B(C<sub>8</sub>H<sub>14</sub>)] was washed with the perfluoropolyether PFO-XR75 (Lancaster) and sealed under a nitrogen atmosphere in a glass capillary. The sample was optically aligned on the four-circle of a Siemens P4 diffractometer equipped with a graphite monochromator, a monocal collimator, a Mo K $\alpha$  radiation source ( $\lambda = 0.71073 \text{ \AA}$ ), and a SMART CCD detector held at 5.050 cm from the crystal. Four sets of 20 frames each were collected using the  $\omega$  scan method and with a 10 s exposure time. Integration of these frames followed by reflection indexing and least-squares refinement produced a crystal orientation matrix for the triclinic crystal lattice.

Data collection consisted of the measurement of a total of 1650 frames in five different runs covering a hemisphere of data. Frame scan parameters are summarized below:

**Table S-1.** Data collection details for RhCl(COD)[PPh<sub>2</sub>CH<sub>2</sub>CH<sub>2</sub>B(C<sub>8</sub>H<sub>14</sub>)].

| Run | 2 $\theta$ | $\omega$ | $\chi$ | $\phi$ | Scan axis | Scan width ( $^\circ$ ) | Frames (#) | Exposure time (sec.) |
|-----|------------|----------|--------|--------|-----------|-------------------------|------------|----------------------|
| 1   | 28         | 43.00    | 0.00   | 280.00 | 2         | -0.3                    | 100        | 40                   |
| 2   | 28         | 43.00    | 90.00  | 280.00 | 2         | -0.3                    | 100        | 40                   |
| 3   | 28         | 43.00    | 180.00 | 280.00 | 2         | -0.3                    | 100        | 40                   |
| 4   | 28         | 43.00    | 270.00 | 280.00 | 2         | -0.3                    | 100        | 40                   |
| 5   | 28         | 28.00    | 0.00   | 30.00  | 3         | 0.3                     | 1250       | 40                   |

The program SMART (version 5.6)<sup>1</sup> was used for diffractometer control, frame scans, indexing, orientation matrix calculations, least-squares refinement of cell parameters, and the data collection. All 1650 crystallographic raw data frames were read by the program SAINT (version 5/6.0)<sup>1</sup> and integrated using 3D profiling algorithms. The resulting data were reduced to produce a total of 9378 reflections and their intensities and estimated standard deviations. An absorption correction was applied using the SADABS routine available in SAINT.<sup>1</sup> The data

were corrected for Lorentz and polarization effects. No evidence of crystal decomposition was observed. Data preparation was carried out by using the program XPREP,<sup>1</sup> which gave 5969 unique reflections ( $R_{\text{int}} = 3.84\%$ ) with indices  $-14 \leq h \leq 14$ ,  $-13 \leq k \leq 15$ ,  $-16 \leq l \leq 16$ . The triclinic space group was determined to be  $P\bar{1}$  (No. 2).

The structure was solved by a combination of direct methods and difference Fourier analysis with the use of SHELXTL 6.1.<sup>2</sup> Idealized positions for the hydrogen atoms were included as fixed contributions using a riding model with isotropic temperature factors set at 1.2 times that of the adjacent carbon atom. Full-matrix least-squares refinement, based upon the minimization of  $\sum w_i |F_o^2 - F_c^2|^2$ , with weighting  $w_i^{-1} = [\sigma^2(F_o^2) + (0.0395 P)^2 + 4.503 P]$ , where  $P = (\text{Max}(F_o^2, 0) + 2 F_c^2)/3$ , converged to give final discrepancy indices<sup>3</sup> of  $R_1 = 0.0547$ ,  $wR_2 = 0.1591$  for 5318 diffraction data with  $I > 2 \sigma(I)$ . The goodness of fit (GOF) value was 1.098.

A correction for secondary extinction was not applied. The maximum and minimum residual electron density peaks in the final difference Fourier map were 1.328 and  $-0.682 \text{ e}/\text{\AA}^3$ , respectively. The linear absorption coefficient, atomic scattering factors, and anomalous dispersion corrections were calculated from values found in the International Tables of X-ray Crystallography.<sup>4</sup>

## References

1. SMART, SAINT and XPREP programs are part of Bruker crystallographic software package for single crystal data collection, reduction and preparation.
2. Sheldrick, G. M., SHELXTL6.1 (2000), Crystallographic software package, Bruker AXS, Inc. Madison, Wisconsin, USA.
3.  $R_1 = \sum (||F_o| - |F_c||) / \sum |F_o|$ ,  $wR_2 = [\sum w(F_o^2 - F_c^2)^2 / \sum w F_o^2]^1/2$ ,  $R_{\text{int.}} = \sum |F_o^2 - F_o^2(\text{mean})| / \sum F_o^2$ , and  $\text{GOF} = [\sum w(F_o^2 - F_c^2)^2 / (n-p)]^1/2$ , where  $n$  is the number of reflections and  $p$  is the total number of parameters which were varied during the last refinement cycle.

4. International Tables for X-ray Crystallography (1974). Vol. IV, p. 55. Birmingham: Kynoch Press. (Present distributor, D. Reidel, Dordrecht.).

**Table S-2.** Crystal data and structure refinement for RhCl(COD)[PPh<sub>2</sub>CH<sub>2</sub>CH<sub>2</sub>B(C<sub>8</sub>H<sub>14</sub>)].

|                                        |                                                                                                                        |
|----------------------------------------|------------------------------------------------------------------------------------------------------------------------|
| Identification code                    | bp1ccd                                                                                                                 |
| Empirical formula                      | C <sub>30</sub> H <sub>40</sub> BCIPRh                                                                                 |
| Formula weight                         | 580.76                                                                                                                 |
| Temperature                            | 293(2) K                                                                                                               |
| Wavelength                             | 0.71073 Å                                                                                                              |
| Crystal system                         | triclinic                                                                                                              |
| Space group                            | P $\bar{1}$                                                                                                            |
| Unit cell dimensions                   | a = 11.074(1) Å $\alpha$ = 65.811(2)°<br>b = 11.690(1) Å $\beta$ = 75.634(1)°<br>c = 13.074(1) Å $\gamma$ = 62.642(1)° |
| Volume                                 | 1367.4(2) Å <sup>3</sup>                                                                                               |
| Z                                      | 2                                                                                                                      |
| Density (calculated)                   | 1.410 g/cm <sup>3</sup>                                                                                                |
| Absorption coefficient                 | 7.98 cm <sup>-1</sup>                                                                                                  |
| F(000)                                 | 604                                                                                                                    |
| Crystal size                           | 0.06 x 0.24 x 0.58 mm                                                                                                  |
| $\theta$ range for data collection     | 1.71 to 27.59°                                                                                                         |
| Index ranges                           | -14 $\leq$ h $\leq$ 14, -13 $\leq$ k $\leq$ 15, -16 $\leq$ l $\leq$ 16                                                 |
| Reflections collected                  | 9378                                                                                                                   |
| Independent reflections                | 5969 [R(int) = 0.0384]                                                                                                 |
| Completeness to $\theta = 27.59^\circ$ | 94.1 %                                                                                                                 |
| Max. and min. transmission             | 0.954 and 0.655                                                                                                        |
| Refinement method                      | Full-matrix least-squares on F <sup>2</sup>                                                                            |
| Data / restraints / parameters         | 5969 / 0 / 307                                                                                                         |
| Goodness-of-fit on F <sup>2</sup>      | 1.098                                                                                                                  |
| Final R indices [ $I > 2\sigma(I)$ ]   | R1 = 0.0547, wR2 = 0.1591                                                                                              |
| R indices (all data)                   | R1 = 0.0604, wR2 = 0.1632                                                                                              |
| Largest diff. peak and hole            | 1.324 and -0.682 e/Å <sup>3</sup>                                                                                      |



**Table S-3.** Atomic coordinates ( $\times 10^4$ ) and equivalent isotropic displacement parameters ( $\text{\AA}^2 \times 10^3$ ) for  $\text{RhCl}(\text{COD})[\text{PPh}_2\text{CH}_2\text{CH}_2\text{B}(\text{C}_8\text{H}_{14})]$ .  $U(\text{eq})$  is defined as one third of the trace of the orthogonalized  $U_{ij}$  tensor.

|       | x        | y        | z        | $U(\text{eq})$ |
|-------|----------|----------|----------|----------------|
| Rh(1) | 6564(1)  | 2178(1)  | 6379(1)  | 34(1)          |
| Cl(1) | 4493(1)  | 3877(1)  | 6865(1)  | 44(1)          |
| P(1)  | 7701(1)  | 2478(1)  | 7432(1)  | 35(1)          |
| C(1)  | 6914(5)  | 2654(6)  | 8799(4)  | 45(1)          |
| C(2)  | 5492(6)  | 3807(6)  | 8792(4)  | 44(1)          |
| C(3)  | 8023(5)  | 4023(5)  | 6663(4)  | 37(1)          |
| C(4)  | 7798(5)  | 4694(5)  | 5528(4)  | 42(1)          |
| C(5)  | 8056(6)  | 5866(6)  | 4920(5)  | 51(1)          |
| C(6)  | 8523(6)  | 6369(6)  | 5437(6)  | 54(1)          |
| C(7)  | 8755(7)  | 5716(6)  | 6577(6)  | 57(1)          |
| C(8)  | 8490(6)  | 4558(6)  | 7185(5)  | 47(1)          |
| C(9)  | 9397(5)  | 1109(5)  | 7832(4)  | 39(1)          |
| C(10) | 10597(5) | 1285(6)  | 7411(5)  | 44(1)          |
| C(11) | 11850(6) | 204(7)   | 7715(5)  | 57(2)          |
| C(12) | 11901(6) | -1073(7) | 8443(5)  | 57(2)          |
| C(13) | 10721(7) | -1263(7) | 8867(5)  | 61(2)          |
| C(14) | 9463(6)  | -178(6)  | 8571(5)  | 54(1)          |
| C(15) | 4193(6)  | 2087(5)  | 9307(4)  | 43(1)          |
| C(16) | 4015(7)  | 1903(6)  | 10569(5) | 54(1)          |
| C(17) | 2781(8)  | 3053(6)  | 10913(5) | 63(2)          |
| C(18) | 2514(6)  | 4512(6)  | 10092(5) | 52(1)          |
| C(19) | 2721(6)  | 4694(5)  | 8824(4)  | 44(1)          |
| C(20) | 3082(6)  | 1934(6)  | 8947(6)  | 56(1)          |
| C(21) | 1653(6)  | 3079(7)  | 8954(7)  | 64(2)          |
| C(22) | 1627(6)  | 4543(7)  | 8449(5)  | 57(2)          |
| C(23) | 5625(6)  | 2442(6)  | 4915(4)  | 47(1)          |
| C(24) | 5379(7)  | 1443(6)  | 5838(5)  | 53(1)          |
| C(25) | 6168(9)  | -82(7)   | 6100(6)  | 73(2)          |
| C(26) | 7707(9)  | -518(6)  | 5926(6)  | 70(2)          |
| C(27) | 8173(6)  | 360(6)   | 6177(5)  | 53(1)          |

|       |         |         |         |       |
|-------|---------|---------|---------|-------|
| C(28) | 8378(6) | 1508(6) | 5362(5) | 53(1) |
| C(29) | 8059(7) | 2095(7) | 4140(5) | 65(2) |
| C(30) | 6701(7) | 2180(7) | 3976(5) | 60(2) |
| B(1)  | 4226(6) | 3577(6) | 8659(4) | 38(1) |

---

**Table S-4.** Interatomic distances [Å] and bond angles [°] for RhCl(COD)[PPh<sub>2</sub>CH<sub>2</sub>CH<sub>2</sub>B(C<sub>8</sub>H<sub>14</sub>)].

---

|             |           |
|-------------|-----------|
| Rh(1)-C(28) | 2.120(6)  |
| Rh(1)-C(27) | 2.123(5)  |
| Rh(1)-C(24) | 2.226(6)  |
| Rh(1)-C(23) | 2.246(5)  |
| Rh(1)-P(1)  | 2.295(1)  |
| Rh(1)-Cl(1) | 2.394(1)  |
| Cl(1)-B(1)  | 2.188(5)  |
| P(1)-C(3)   | 1.824(5)  |
| P(1)-C(1)   | 1.833(5)  |
| P(1)-C(9)   | 1.844(5)  |
| C(1)-C(2)   | 1.530(8)  |
| C(2)-B(1)   | 1.605(8)  |
| C(3)-C(4)   | 1.389(7)  |
| C(3)-C(8)   | 1.394(7)  |
| C(4)-C(5)   | 1.395(8)  |
| C(5)-C(6)   | 1.360(9)  |
| C(6)-C(7)   | 1.396(9)  |
| C(7)-C(8)   | 1.385(8)  |
| C(9)-C(10)  | 1.380(7)  |
| C(9)-C(14)  | 1.395(7)  |
| C(10)-C(11) | 1.389(8)  |
| C(11)-C(12) | 1.387(9)  |
| C(12)-C(13) | 1.368(9)  |
| C(13)-C(14) | 1.393(8)  |
| C(15)-C(20) | 1.524(8)  |
| C(15)-C(16) | 1.548(8)  |
| C(15)-B(1)  | 1.608(7)  |
| C(16)-C(17) | 1.542(9)  |
| C(17)-C(18) | 1.531(8)  |
| C(18)-C(19) | 1.552(7)  |
| C(19)-C(22) | 1.517(8)  |
| C(19)-B(1)  | 1.607(8)  |
| C(20)-C(21) | 1.534(9)  |
| C(21)-C(22) | 1.551(10) |

|             |           |
|-------------|-----------|
| C(23)-C(24) | 1.367(8)  |
| C(23)-C(30) | 1.506(8)  |
| C(24)-C(25) | 1.508(9)  |
| C(25)-C(26) | 1.524(12) |
| C(26)-C(27) | 1.508(9)  |
| C(27)-C(28) | 1.406(9)  |
| C(28)-C(29) | 1.519(8)  |
| C(29)-C(30) | 1.524(11) |

|                   |            |
|-------------------|------------|
| P(1)-Rh(1)-Cl(1)  | 89.07(5)   |
| B(1)-Cl(1)-Rh(1)  | 112.55(16) |
| C(3)-P(1)-C(1)    | 104.1(3)   |
| C(3)-P(1)-C(9)    | 104.2(2)   |
| C(1)-P(1)-C(9)    | 100.6(2)   |
| C(3)-P(1)-Rh(1)   | 110.74(16) |
| C(1)-P(1)-Rh(1)   | 119.14(18) |
| C(9)-P(1)-Rh(1)   | 116.37(18) |
| C(2)-C(1)-P(1)    | 116.1(4)   |
| C(1)-C(2)-B(1)    | 117.9(4)   |
| C(4)-C(3)-C(8)    | 118.7(5)   |
| C(4)-C(3)-P(1)    | 119.6(4)   |
| C(8)-C(3)-P(1)    | 121.7(4)   |
| C(3)-C(4)-C(5)    | 120.5(5)   |
| C(6)-C(5)-C(4)    | 120.2(5)   |
| C(5)-C(6)-C(7)    | 120.4(5)   |
| C(8)-C(7)-C(6)    | 119.5(6)   |
| C(7)-C(8)-C(3)    | 120.6(5)   |
| C(10)-C(9)-C(14)  | 118.8(5)   |
| C(10)-C(9)-P(1)   | 123.4(4)   |
| C(14)-C(9)-P(1)   | 117.8(4)   |
| C(9)-C(10)-C(11)  | 120.9(5)   |
| C(12)-C(11)-C(10) | 119.7(6)   |
| C(13)-C(12)-C(11) | 120.0(6)   |
| C(12)-C(13)-C(14) | 120.4(6)   |
| C(13)-C(14)-C(9)  | 120.2(6)   |
| C(20)-C(15)-C(16) | 112.9(5)   |

|                   |          |
|-------------------|----------|
| C(20)-C(15)-B(1)  | 113.2(4) |
| C(16)-C(15)-B(1)  | 104.7(4) |
| C(17)-C(16)-C(15) | 115.4(5) |
| C(18)-C(17)-C(16) | 115.5(5) |
| C(17)-C(18)-C(19) | 115.8(5) |
| C(22)-C(19)-C(18) | 112.6(5) |
| C(22)-C(19)-B(1)  | 112.9(5) |
| C(18)-C(19)-B(1)  | 105.3(4) |
| C(15)-C(20)-C(21) | 115.3(5) |
| C(20)-C(21)-C(22) | 114.1(5) |
| C(19)-C(22)-C(21) | 114.9(5) |
| C(24)-C(23)-C(30) | 124.8(6) |
| C(23)-C(24)-C(25) | 125.8(6) |
| C(24)-C(25)-C(26) | 113.3(6) |
| C(27)-C(26)-C(25) | 113.3(6) |
| C(28)-C(27)-C(26) | 124.0(6) |
| C(27)-C(28)-C(29) | 124.9(6) |
| C(28)-C(29)-C(30) | 114.0(5) |
| C(23)-C(30)-C(29) | 113.7(5) |
| C(2)-B(1)-C(19)   | 117.5(5) |
| C(2)-B(1)-C(15)   | 118.6(5) |
| C(19)-B(1)-C(15)  | 107.4(4) |
| C(2)-B(1)-Cl(1)   | 101.1(3) |
| C(19)-B(1)-Cl(1)  | 104.4(3) |
| C(15)-B(1)-Cl(1)  | 106.0(3) |

---

**Table S-5.** Anisotropic displacement parameters ( $\text{\AA}^2 \times 10^3$ ) for  $\text{RhCl}(\text{COD})[\text{PPh}_2\text{CH}_2\text{CH}_2\text{B}(\text{C}_8\text{H}_{14})]$ . The anisotropic displacement factor exponent takes the form:  
 $-2h^2 [h^2 a^* U_{11} + \dots + 2 h k a^* b^* U_{12}]$ .

|       | $U_{11}$ | $U_{22}$ | $U_{33}$ | $U_{23}$ | $U_{13}$ | $U_{12}$ |
|-------|----------|----------|----------|----------|----------|----------|
| Rh(1) | 33(1)    | 34(1)    | 32(1)    | -13(1)   | -3(1)    | -10(1)   |
| Cl(1) | 36(1)    | 52(1)    | 37(1)    | -20(1)   | -3(1)    | -8(1)    |
| P(1)  | 31(1)    | 38(1)    | 32(1)    | -11(1)   | -2(1)    | -13(1)   |
| C(1)  | 38(3)    | 65(3)    | 34(2)    | -18(2)   | 0(2)     | -23(2)   |
| C(2)  | 46(3)    | 53(3)    | 42(3)    | -25(2)   | 3(2)     | -23(2)   |
| C(3)  | 34(2)    | 34(2)    | 39(2)    | -12(2)   | -2(2)    | -10(2)   |
| C(4)  | 39(3)    | 42(3)    | 41(2)    | -12(2)   | -4(2)    | -14(2)   |
| C(5)  | 47(3)    | 41(3)    | 47(3)    | -7(2)    | -1(2)    | -11(2)   |
| C(6)  | 53(3)    | 35(3)    | 70(4)    | -21(2)   | 9(3)     | -19(2)   |
| C(7)  | 62(4)    | 49(3)    | 69(4)    | -26(3)   | 0(3)     | -27(3)   |
| C(8)  | 54(3)    | 47(3)    | 44(3)    | -18(2)   | -4(2)    | -22(3)   |
| C(9)  | 38(2)    | 45(3)    | 34(2)    | -10(2)   | -5(2)    | -16(2)   |
| C(10) | 39(3)    | 47(3)    | 49(3)    | -20(2)   | 1(2)     | -19(2)   |
| C(11) | 34(3)    | 80(4)    | 62(4)    | -37(3)   | 0(3)     | -18(3)   |
| C(12) | 46(3)    | 59(4)    | 53(3)    | -19(3)   | -17(3)   | -3(3)    |
| C(13) | 58(4)    | 49(3)    | 52(3)    | 2(3)     | -18(3)   | -12(3)   |
| C(14) | 43(3)    | 51(3)    | 52(3)    | 0(2)     | -11(2)   | -19(3)   |
| C(15) | 41(3)    | 38(2)    | 47(3)    | -16(2)   | -1(2)    | -12(2)   |
| C(16) | 60(4)    | 44(3)    | 47(3)    | -11(2)   | -1(3)    | -18(3)   |
| C(17) | 70(4)    | 52(3)    | 47(3)    | -14(3)   | 6(3)     | -17(3)   |
| C(18) | 50(3)    | 53(3)    | 46(3)    | -28(2)   | 12(2)    | -14(3)   |
| C(19) | 41(3)    | 41(3)    | 43(3)    | -17(2)   | 5(2)     | -12(2)   |
| C(20) | 53(3)    | 54(3)    | 66(4)    | -23(3)   | 3(3)     | -28(3)   |
| C(21) | 41(3)    | 77(4)    | 83(5)    | -32(4)   | 1(3)     | -29(3)   |
| C(22) | 34(3)    | 65(4)    | 59(3)    | -21(3)   | -1(2)    | -10(3)   |
| C(23) | 50(3)    | 48(3)    | 41(3)    | -20(2)   | -11(2)   | -11(2)   |
| C(24) | 64(4)    | 60(3)    | 46(3)    | -21(3)   | -10(3)   | -29(3)   |
| C(25) | 111(7)   | 54(4)    | 72(4)    | -16(3)   | -30(4)   | -42(4)   |
| C(26) | 98(6)    | 35(3)    | 69(4)    | -16(3)   | -28(4)   | -12(3)   |

|       |       |       |       |        |        |        |
|-------|-------|-------|-------|--------|--------|--------|
| C(27) | 50(3) | 42(3) | 55(3) | -24(2) | -11(3) | 2(2)   |
| C(28) | 43(3) | 52(3) | 52(3) | -30(3) | 1(2)   | -3(2)  |
| C(29) | 63(4) | 69(4) | 44(3) | -26(3) | 12(3)  | -15(3) |
| C(30) | 71(4) | 55(3) | 41(3) | -19(2) | -8(3)  | -10(3) |
| B(1)  | 40(3) | 43(3) | 32(2) | -16(2) | 3(2)   | -17(2) |

---

**Table S-6.** Hydrogen atom coordinates ( $\times 10^4$ ) and isotropic displacement parameters ( $\text{\AA}^2 \times 10^3$ ) for  $\text{RhCl}(\text{COD})[\text{PPh}_2\text{CH}_2\text{CH}_2\text{B}(\text{C}_8\text{H}_{14})]$ .

|        | x     | y     | z     | U(eq) |
|--------|-------|-------|-------|-------|
| H(1A)  | 6858  | 1793  | 9297  | 54    |
| H(1B)  | 7513  | 2801  | 9116  | 54    |
| H(2A)  | 5512  | 4629  | 8184  | 53    |
| H(2B)  | 5317  | 3985  | 9489  | 53    |
| H(4)   | 7472  | 4358  | 5171  | 50    |
| H(5)   | 7907  | 6304  | 4159  | 62    |
| H(6)   | 8689  | 7153  | 5028  | 65    |
| H(7)   | 9086  | 6055  | 6926  | 68    |
| H(8)   | 8624  | 4133  | 7948  | 56    |
| H(10)  | 10566 | 2138  | 6916  | 53    |
| H(11)  | 12651 | 337   | 7432  | 69    |
| H(12)  | 12739 | -1801 | 8644  | 69    |
| H(13)  | 10759 | -2120 | 9355  | 74    |
| H(14)  | 8664  | -313  | 8866  | 64    |
| H(15)  | 5078  | 1394  | 9157  | 52    |
| H(16A) | 3930  | 1040  | 11003 | 65    |
| H(16B) | 4836  | 1838  | 10771 | 65    |
| H(17A) | 1973  | 2887  | 11001 | 75    |
| H(17B) | 2916  | 2995  | 11640 | 75    |
| H(18A) | 3111  | 4820  | 10238 | 62    |
| H(18B) | 1583  | 5108  | 10248 | 62    |
| H(19)  | 2702  | 5611  | 8384  | 53    |
| H(20A) | 3039  | 1067  | 9442  | 67    |
| H(20B) | 3343  | 1894  | 8193  | 67    |
| H(21A) | 1257  | 2925  | 9724  | 77    |
| H(21B) | 1084  | 3025  | 8533  | 77    |
| H(22A) | 1726  | 4813  | 7636  | 69    |
| H(22B) | 743   | 5174  | 8653  | 69    |
| H(23)  | 5089  | 3350  | 4864  | 56    |
| H(24)  | 4662  | 1728  | 6350  | 64    |
| H(25A) | 5894  | -364  | 5625  | 87    |



|        |      |       |      |    |
|--------|------|-------|------|----|
| H(25B) | 5934 | -553  | 6875 | 87 |
| H(26A) | 8146 | -1463 | 6408 | 84 |
| H(26B) | 7999 | -477  | 5153 | 84 |
| H(27)  | 8334 | 128   | 6916 | 64 |
| H(28)  | 8735 | 1942  | 5589 | 63 |
| H(29A) | 8782 | 1529  | 3740 | 78 |
| H(29B) | 8053 | 3007  | 3808 | 78 |
| H(30A) | 6369 | 2910  | 3276 | 73 |
| H(30B) | 6848 | 1327  | 3912 | 73 |

---

ORTEP Representation and X-ray Crystallographic Structure Data for Compound 8

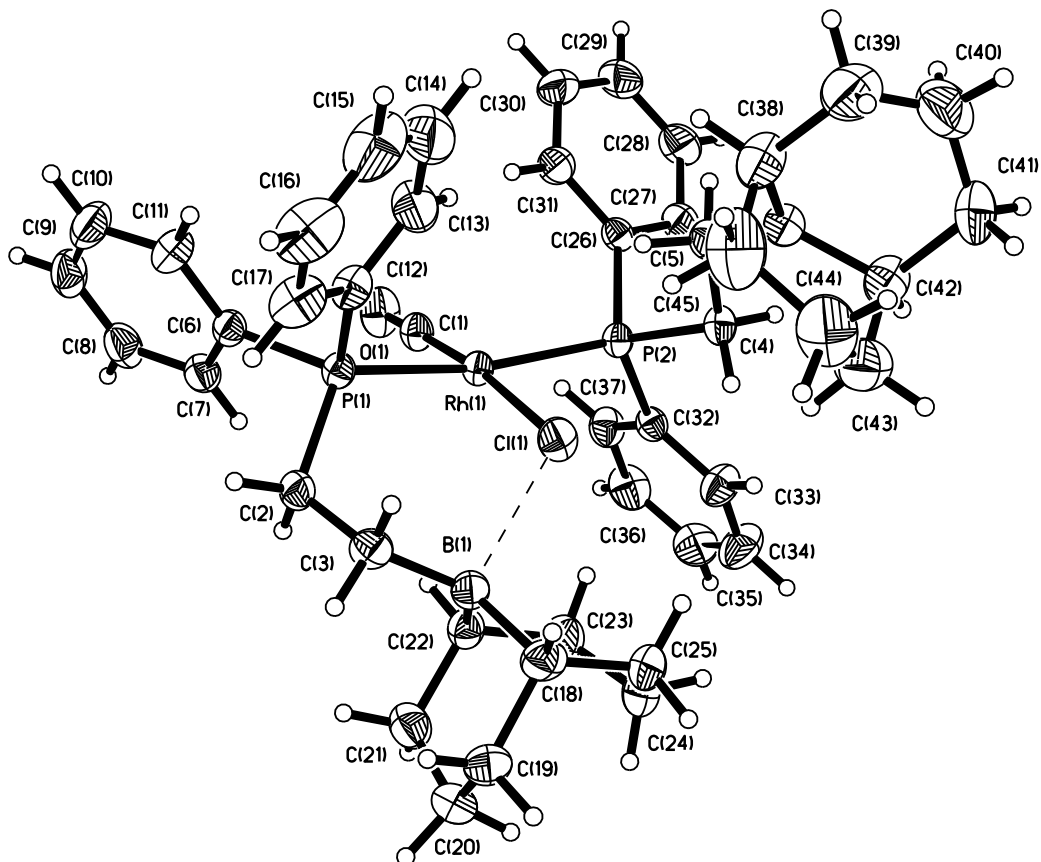

**Figure S-32.** Perspective view of the molecular structure of  $\text{Rh}(\text{CO})\text{Cl}(\text{PPh}_2\text{CH}_2\text{CH}_2\text{-9-BBN})_2$  with the atom labeling scheme. The thermal ellipsoids are scaled to enclose 30% probability.

## Description of the X-ray Structural Analysis of $\text{Rh}(\text{CO})\text{Cl}(\text{PPh}_2\text{CH}_2\text{CH}_2\text{-9-BBN})_2\cdot\text{C}_4\text{H}_{10}\text{O}$

An orange crystal of  $\text{Rh}(\text{CO})\text{Cl}(\text{PPh}_2\text{CH}_2\text{CH}_2\text{-9-BBN})_2\cdot\text{C}_4\text{H}_{10}\text{O}$  was washed with the perfluoropolyether PFO-XR75 (Lancaster) and sealed in a glass capillary under nitrogen. The sample was optically aligned on the four-circle of a Siemens P4 diffractometer equipped with a graphite monochromator, a Mo  $\text{K}\alpha$  radiation source ( $\lambda = 0.71073 \text{ \AA}$ ), and a SMART CCD detector held at 5.050 cm from the crystal. Four sets of 20 frames each were collected using the  $\omega$  scan method and with a 10 s exposure time. Integration of these frames followed by reflection indexing and least-squares refinement produced a crystal orientation matrix for the monoclinic crystal lattice.

Data collection consisted of the measurement of a total of 1650 frames in five different runs covering a hemisphere of data. Frame scan parameters are summarized below:

Table S-7. Data collection details for  $\text{Rh}(\text{CO})\text{Cl}(\text{PPh}_2\text{CH}_2\text{CH}_2\text{-9-BBN})_2\cdot\text{C}_4\text{H}_{10}\text{O}$

| Run | Scan       |          | Scan   | Frames | Exposure |                    |      |             |
|-----|------------|----------|--------|--------|----------|--------------------|------|-------------|
|     | 2 $\theta$ | $\omega$ |        |        | axis     | width ( $^\circ$ ) | (#)  | time (sec.) |
| 1   | 28         | 43.00    | 0.00   | 280.00 | 2        | -0.3               | 100  | 40          |
| 2   | 28         | 43.00    | 90.00  | 280.00 | 2        | -0.3               | 100  | 40          |
| 3   | 28         | 43.00    | 180.00 | 280.00 | 2        | -0.3               | 100  | 40          |
| 4   | 28         | 43.00    | 270.00 | 280.00 | 2        | -0.3               | 100  | 40          |
| 5   | 28         | 28.00    | 0.00   | 30.00  | 3        | 0.3                | 1250 | 40          |

The program SMART (version 5.6)<sup>1</sup> was used for diffractometer control, frame scans, indexing, orientation matrix calculations, least-squares refinement of cell parameters, and the data collection. All 1650 crystallographic raw data frames were read by program SAINT (version 5/6.0)<sup>1</sup> and integrated using 3D profiling algorithms. The resulting data were reduced to produce a total of 35144 reflections and their intensities and estimated standard deviations. An absorption correction was applied using the SADABS routine available in SAINT.<sup>1</sup> The data

were corrected for Lorentz and polarization effects. Data preparation was carried out by using the program XPREP,<sup>1</sup> which gave 11231 unique reflections ( $R_{\text{int}} = 5.08\%$ ) with indices  $-14 \leq h \leq 14$ ,  $-30 \leq k \leq 30$ ,  $-24 \leq l \leq 24$ . The monoclinic space group was determined to be  $P2_1/n$ , a nonstandard setting of  $P2_1/c$  (No. 14).

The structure was solved by a combination of direct methods and difference Fourier analysis with the use of SHELXTL 6.1.<sup>2</sup> The crystallographic asymmetric unit contains independent molecules of  $\text{Rh}(\text{CO})\text{Cl}(\text{PPh}_2\text{CH}_2\text{CH}_2\text{-9-BBN})_2 \cdot \text{C}_4\text{H}_{10}\text{O}$  and highly disordered molecules of ether. Idealized positions for the hydrogen atoms were included as fixed contributions using a riding model with isotropic temperature factors set at 1.2 (aromatic and B-H protons) or 1.5 (methyl protons) times that of the adjacent non-hydrogen atom. The positions of the methyl hydrogen atoms were optimized by a rigid rotating group refinement with idealized tetrahedral angles. The diethyl ether was treated as a diffuse electron density contribution with the aid of the SQUEEZE routine in the program PLATON.<sup>3</sup> Although specific positions for the independent carbon, hydrogen, and oxygen atoms of the diethyl ether were not determined, the calculated density, absorption coefficient and empirical formula weight reflect their presence within the crystal lattice. Full-matrix least-squares refinement, based upon the minimization of  $\sum w_i |F_o^2 - F_c^2|^2$ , with weighting  $w_i^{-1} = [\sigma^2(F_o^2) + (0.0898 P)^2 + 0.7165 P]$ , where  $P = (\text{Max}(F_o^2, 0) + 2 F_c^2)/3$ , converged to give final discrepancy indices<sup>4</sup> of  $R1 = 0.0367$ ,  $wR2 = 0.1461$  for 6739 data with  $l > 2 \sigma(l)$ . The goodness of fit (GOF) value was 1.031.

A correction for secondary extinction was not applied. The maximum and minimum residual electron density peaks in the final difference Fourier map were 0.348 and  $-0.274 \text{ e}/\text{\AA}^3$ , respectively. The linear absorption coefficient, atomic scattering factors, and anomalous dispersion corrections were calculated from values found in the International Tables of X-ray Crystallography.<sup>5</sup>

## References

1. SMART, SAINT and XPREP programs are part of Bruker crystallographic software package for single crystal data collection, reduction and preparation.
2. Sheldrick, G. M., SHELXTL6.1 (2000), Crystallographic software package, Bruker AXS, Inc. Madison, Wisconsin, USA.
3. PLATON, written by Professor Anthony L. Spek, Bijvoet Centre for Biomolecular Research, Utrecht University. Current versions of PLATON for Windows are available from Professor Louis J. Farrugia, Department of Chemistry, University of Glasgow at [www.chem.gla.ac.uk/~louis/software/](http://www.chem.gla.ac.uk/~louis/software/).
4.  $R_1 = \sum (||F_o| - |F_c||) / \sum |F_o|$ ,  $wR_2 = [\sum w(F_o^2 - F_c^2)^2] / \sum w F_o^2]^1/2$ ,  $R_{int.} = \sum |F_o^2 - F_o^2(\text{mean})|^2 / \sum F_o^2$ , and  $GOF = [\sum w(F_o^2 - F_c^2)^2] / (n-p)]^{1/2}$ , where n is the number of reflections and p is the total number of parameters which were varied during the last refinement cycle.
5. International Tables for X-ray Crystallography (1974). Vol. IV, p. 55. Birmingham: Kynoch Press. (Present distributor, D. Reidel, Dordrecht.).

**Table S-8.** Crystal data and structure refinement for Rh(CO)Cl(PPh<sub>2</sub>CH<sub>2</sub>CH<sub>2</sub>-9-BBN)<sub>2</sub>·C<sub>4</sub>H<sub>10</sub>O.

|                                   |                                                                                   |                |
|-----------------------------------|-----------------------------------------------------------------------------------|----------------|
| Identification code               | bp5plt                                                                            |                |
| Empirical formula                 | C <sub>49</sub> H <sub>66</sub> B <sub>2</sub> ClO <sub>2</sub> P <sub>2</sub> Rh |                |
| Formula weight                    | 908.94                                                                            |                |
| Temperature                       | 293(2) K                                                                          |                |
| Wavelength                        | 0.71073 Å                                                                         |                |
| Crystal system                    | monoclinic                                                                        |                |
| Space group                       | P2 <sub>1</sub> /n                                                                |                |
| Unit cell dimensions              | a = 10.851(1) Å                                                                   | ∠ = 90°        |
|                                   | b = 18.685(2) Å                                                                   | ∠ = 97.510(2)° |
|                                   | c = 23.362(2) Å                                                                   | ∠ = 90°        |
| Volume                            | 4696.1(8) Å <sup>3</sup>                                                          |                |
| Z                                 | 4                                                                                 |                |
| Density (calculated)              | 1.286 g/cm <sup>3</sup>                                                           |                |
| Absorption coefficient            | 5.26 cm <sup>-1</sup>                                                             |                |
| F(000)                            | 1912                                                                              |                |
| Crystal size                      | 0.18 x 0.30 x 0.38 mm                                                             |                |
| θ range for data collection       | 2.07 to 27.56°                                                                    |                |
| Index ranges                      | -13 ≤ h ≤ 14, -23 ≤ k ≤ 24, -27 ≤ l ≤ 30                                          |                |
| Reflections collected             | 33424                                                                             |                |
| Independent reflections           | 10790 [R(int) = 0.0384]                                                           |                |
| Completeness to θ = 27.56°        | 99.4 %                                                                            |                |
| Max. and min. transmission        | 0.9113 and 0.8253                                                                 |                |
| Refinement method                 | Full-matrix least-squares on F <sup>2</sup>                                       |                |
| Data / restraints / parameters    | 10790 / 0 / 469                                                                   |                |
| Goodness-of-fit on F <sup>2</sup> | 1.031                                                                             |                |
| Final R indices [I > 2σ(I)]       | R1 = 0.0367, wR2 = 0.1025                                                         |                |
| R indices (all data)              | R1 = 0.0527, wR2 = 0.1085                                                         |                |
| Largest diff. peak and hole       | 0.431 and -0.318 e/Å <sup>3</sup>                                                 |                |

**Table S-9.** Atomic coordinates ( $\times 10^4$ ) and equivalent isotropic displacement parameters ( $\text{\AA}^2 \times 10^3$ ) for  $\text{Rh}(\text{CO})\text{Cl}(\text{PPh}_2\text{CH}_2\text{CH}_2\text{-9-BBN})_2\cdot\text{C}_4\text{H}_{10}\text{O}$ .  $U(\text{eq})$  is defined as one third of the trace of the orthogonalized  $U_{ij}$  tensor.

|       | x        | y       | z       | U(eq)  |
|-------|----------|---------|---------|--------|
| Rh(1) | 7704(1)  | 5238(1) | 1893(1) | 35(1)  |
| Cl(1) | 9395(1)  | 4772(1) | 2535(1) | 55(1)  |
| P(1)  | 9070(1)  | 6133(1) | 1713(1) | 38(1)  |
| P(2)  | 6525(1)  | 4205(1) | 1948(1) | 37(1)  |
| O(1)  | 5562(2)  | 5941(1) | 1220(1) | 67(1)  |
| C(1)  | 6406(2)  | 5664(1) | 1474(1) | 45(1)  |
| C(2)  | 9791(2)  | 6652(1) | 2332(1) | 49(1)  |
| C(3)  | 10534(2) | 6225(2) | 2820(1) | 51(1)  |
| C(4)  | 7482(2)  | 3413(1) | 2124(1) | 45(1)  |
| C(5)  | 8369(2)  | 3278(1) | 1671(1) | 49(1)  |
| C(6)  | 8490(2)  | 6843(1) | 1220(1) | 43(1)  |
| C(7)  | 7487(3)  | 7253(1) | 1344(1) | 54(1)  |
| C(8)  | 7042(3)  | 7808(2) | 987(2)  | 67(1)  |
| C(9)  | 7560(3)  | 7958(2) | 502(2)  | 72(1)  |
| C(10) | 8537(3)  | 7562(2) | 367(1)  | 75(1)  |
| C(11) | 8999(3)  | 7000(2) | 720(1)  | 61(1)  |
| C(12) | 10342(2) | 5746(2) | 1383(1) | 51(1)  |
| C(13) | 10125(4) | 5144(2) | 1053(2) | 80(1)  |
| C(14) | 11096(5) | 4838(2) | 788(2)  | 113(2) |
| C(15) | 12234(4) | 5146(3) | 861(2)  | 113(2) |
| C(16) | 12448(3) | 5742(3) | 1183(2) | 98(1)  |
| C(17) | 11514(2) | 6046(2) | 1443(2) | 73(1)  |
| C(18) | 10600(3) | 5330(2) | 3736(1) | 61(1)  |
| C(19) | 10876(3) | 5931(2) | 4193(1) | 73(1)  |
| C(20) | 9754(3)  | 6342(2) | 4337(1) | 74(1)  |
| C(21) | 8810(3)  | 6540(2) | 3815(1) | 68(1)  |
| C(22) | 8512(2)  | 5927(1) | 3374(1) | 51(1)  |
| C(23) | 7812(3)  | 5306(2) | 3606(2) | 69(1)  |
| C(24) | 8583(4)  | 4854(2) | 4071(2) | 82(1)  |
| C(25) | 9903(4)  | 4691(2) | 3959(2) | 76(1)  |

|       |          |         |         |        |
|-------|----------|---------|---------|--------|
| C(26) | 5610(2)  | 3952(1) | 1268(1) | 40(1)  |
| C(27) | 4642(3)  | 3466(2) | 1258(1) | 56(1)  |
| C(28) | 3973(3)  | 3265(2) | 736(2)  | 70(1)  |
| C(29) | 4255(3)  | 3540(2) | 227(2)  | 73(1)  |
| C(30) | 5225(3)  | 4017(2) | 235(1)  | 70(1)  |
| C(31) | 5900(3)  | 4219(2) | 752(1)  | 56(1)  |
| C(32) | 5396(2)  | 4205(1) | 2458(1) | 41(1)  |
| C(33) | 5608(3)  | 3851(2) | 2976(1) | 61(1)  |
| C(34) | 4747(3)  | 3876(2) | 3364(2) | 82(1)  |
| C(35) | 3673(3)  | 4245(2) | 3232(2) | 76(1)  |
| C(36) | 3441(3)  | 4609(2) | 2720(2) | 70(1)  |
| C(37) | 4304(3)  | 4588(2) | 2333(1) | 56(1)  |
| C(38) | 10606(3) | 2735(2) | 1507(2) | 77(1)  |
| C(39) | 11050(4) | 2001(3) | 1356(2) | 108(2) |
| C(40) | 10389(5) | 1417(3) | 1568(2) | 120(2) |
| C(41) | 9996(4)  | 1440(2) | 2144(2) | 86(1)  |
| C(42) | 9538(3)  | 2169(2) | 2312(2) | 69(1)  |
| C(43) | 10426(4) | 2534(3) | 2755(2) | 94(1)  |
| C(44) | 11637(4) | 2703(3) | 2566(2) | 117(2) |
| C(45) | 11557(4) | 3097(3) | 1981(3) | 120(2) |
| B(1)  | 9811(3)  | 5710(2) | 3204(1) | 48(1)  |
| B(2)  | 9424(3)  | 2724(2) | 1810(1) | 51(1)  |

---



**Table S-10.** Interatomic distances [Å] and bond angles [°] for Rh(CO)Cl(PPh<sub>2</sub>CH<sub>2</sub>CH<sub>2</sub>-9-BBN)<sub>2</sub>·C<sub>4</sub>H<sub>10</sub>O.

---

|             |           |
|-------------|-----------|
| Rh(1)-C(1)  | 1.793(3)  |
| Rh(1)-P(1)  | 2.3091(6) |
| Rh(1)-P(2)  | 2.3293(6) |
| Rh(1)-Cl(1) | 2.3781(7) |
| P(1)-C(6)   | 1.816(2)  |
| P(1)-C(12)  | 1.816(3)  |
| P(1)-C(2)   | 1.829(3)  |
| P(2)-C(32)  | 1.818(2)  |
| P(2)-C(26)  | 1.821(2)  |
| P(2)-C(4)   | 1.823(2)  |
| O(1)-C(1)   | 1.147(3)  |
| C(2)-C(3)   | 1.532(4)  |
| C(3)-B(1)   | 1.591(4)  |
| C(4)-C(5)   | 1.541(3)  |
| C(5)-B(2)   | 1.546(4)  |
| C(6)-C(11)  | 1.385(4)  |
| C(6)-C(7)   | 1.392(4)  |
| C(7)-C(8)   | 1.379(4)  |
| C(8)-C(9)   | 1.359(5)  |
| C(9)-C(10)  | 1.363(5)  |
| C(10)-C(11) | 1.387(4)  |
| C(12)-C(13) | 1.366(5)  |
| C(12)-C(17) | 1.380(4)  |
| C(13)-C(14) | 1.411(5)  |
| C(14)-C(15) | 1.353(7)  |
| C(15)-C(16) | 1.348(7)  |
| C(16)-C(17) | 1.370(5)  |
| C(18)-C(25) | 1.540(5)  |
| C(18)-C(19) | 1.552(4)  |
| C(18)-B(1)  | 1.582(4)  |
| C(19)-C(20) | 1.514(5)  |
| C(20)-C(21) | 1.530(4)  |
| C(21)-C(22) | 1.547(4)  |

|             |          |
|-------------|----------|
| C(22)-C(23) | 1.525(4) |
| C(22)-B(1)  | 1.567(4) |
| C(23)-C(24) | 1.535(5) |
| C(24)-C(25) | 1.519(5) |
| C(26)-C(31) | 1.379(4) |
| C(26)-C(27) | 1.387(3) |
| C(27)-C(28) | 1.388(4) |
| C(28)-C(29) | 1.366(5) |
| C(29)-C(30) | 1.377(5) |
| C(30)-C(31) | 1.380(4) |
| C(32)-C(33) | 1.371(4) |
| C(32)-C(37) | 1.383(4) |
| C(33)-C(34) | 1.385(4) |
| C(34)-C(35) | 1.355(5) |
| C(35)-C(36) | 1.371(5) |
| C(36)-C(37) | 1.384(4) |
| C(38)-C(39) | 1.509(5) |
| C(38)-B(2)  | 1.545(4) |
| C(38)-C(45) | 1.565(6) |
| C(39)-C(40) | 1.429(6) |
| C(40)-C(41) | 1.464(6) |
| C(41)-C(42) | 1.520(5) |
| C(42)-C(43) | 1.484(5) |
| C(42)-B(2)  | 1.557(4) |
| C(43)-C(44) | 1.474(6) |
| C(44)-C(45) | 1.546(7) |

|                  |           |
|------------------|-----------|
| C(1)-Rh(1)-P(1)  | 93.28(8)  |
| C(1)-Rh(1)-P(2)  | 89.97(8)  |
| P(1)-Rh(1)-P(2)  | 168.67(2) |
| C(1)-Rh(1)-Cl(1) | 173.32(8) |
| P(1)-Rh(1)-Cl(1) | 85.40(2)  |
| P(2)-Rh(1)-Cl(1) | 92.59(2)  |
| C(6)-P(1)-C(12)  | 103.9(1)  |
| C(6)-P(1)-C(2)   | 101.0(1)  |
| C(12)-P(1)-C(2)  | 106.1(1)  |

|                   |           |
|-------------------|-----------|
| C(6)-P(1)-Rh(1)   | 117.85(8) |
| C(12)-P(1)-Rh(1)  | 109.3(1)  |
| C(2)-P(1)-Rh(1)   | 117.28(9) |
| C(32)-P(2)-C(26)  | 103.5(1)  |
| C(32)-P(2)-C(4)   | 105.3(1)  |
| C(26)-P(2)-C(4)   | 102.5(1)  |
| C(32)-P(2)-Rh(1)  | 117.26(8) |
| C(26)-P(2)-Rh(1)  | 114.10(8) |
| C(4)-P(2)-Rh(1)   | 112.62(8) |
| O(1)-C(1)-Rh(1)   | 178.1(2)  |
| C(3)-C(2)-P(1)    | 116.2(2)  |
| C(2)-C(3)-B(1)    | 119.0(2)  |
| C(5)-C(4)-P(2)    | 111.4(2)  |
| C(4)-C(5)-B(2)    | 118.4(2)  |
| C(11)-C(6)-C(7)   | 117.9(3)  |
| C(11)-C(6)-P(1)   | 123.1(2)  |
| C(7)-C(6)-P(1)    | 119.0(2)  |
| C(8)-C(7)-C(6)    | 120.5(3)  |
| C(9)-C(8)-C(7)    | 120.7(3)  |
| C(8)-C(9)-C(10)   | 119.9(3)  |
| C(9)-C(10)-C(11)  | 120.4(3)  |
| C(6)-C(11)-C(10)  | 120.5(3)  |
| C(13)-C(12)-C(17) | 118.7(3)  |
| C(13)-C(12)-P(1)  | 118.9(2)  |
| C(17)-C(12)-P(1)  | 122.5(3)  |
| C(12)-C(13)-C(14) | 119.9(4)  |
| C(15)-C(14)-C(13) | 119.6(4)  |
| C(16)-C(15)-C(14) | 120.7(4)  |
| C(15)-C(16)-C(17) | 120.4(4)  |
| C(16)-C(17)-C(12) | 120.8(4)  |
| C(25)-C(18)-C(19) | 112.8(3)  |
| C(25)-C(18)-B(1)  | 112.0(3)  |
| C(19)-C(18)-B(1)  | 104.5(2)  |
| C(20)-C(19)-C(18) | 115.6(3)  |
| C(19)-C(20)-C(21) | 114.9(3)  |
| C(20)-C(21)-C(22) | 114.3(3)  |

|                   |          |
|-------------------|----------|
| C(23)-C(22)-C(21) | 113.4(2) |
| C(23)-C(22)-B(1)  | 113.5(2) |
| C(21)-C(22)-B(1)  | 104.1(2) |
| C(22)-C(23)-C(24) | 114.8(3) |
| C(25)-C(24)-C(23) | 115.3(3) |
| C(24)-C(25)-C(18) | 114.8(3) |
| C(31)-C(26)-C(27) | 118.8(2) |
| C(31)-C(26)-P(2)  | 120.5(2) |
| C(27)-C(26)-P(2)  | 120.7(2) |
| C(26)-C(27)-C(28) | 120.0(3) |
| C(29)-C(28)-C(27) | 120.8(3) |
| C(28)-C(29)-C(30) | 119.4(3) |
| C(29)-C(30)-C(31) | 120.4(3) |
| C(26)-C(31)-C(30) | 120.7(3) |
| C(33)-C(32)-C(37) | 118.4(2) |
| C(33)-C(32)-P(2)  | 121.9(2) |
| C(37)-C(32)-P(2)  | 119.6(2) |
| C(32)-C(33)-C(34) | 120.8(3) |
| C(35)-C(34)-C(33) | 120.2(3) |
| C(34)-C(35)-C(36) | 120.3(3) |
| C(35)-C(36)-C(37) | 119.5(3) |
| C(32)-C(37)-C(36) | 120.8(3) |
| C(39)-C(38)-B(2)  | 113.8(3) |
| C(39)-C(38)-C(45) | 110.9(3) |
| B(2)-C(38)-C(45)  | 101.0(3) |
| C(40)-C(39)-C(38) | 115.0(3) |
| C(39)-C(40)-C(41) | 121.0(4) |
| C(40)-C(41)-C(42) | 114.1(3) |
| C(43)-C(42)-C(41) | 112.8(3) |
| C(43)-C(42)-B(2)  | 101.5(3) |
| C(41)-C(42)-B(2)  | 113.5(3) |
| C(44)-C(43)-C(42) | 114.4(4) |
| C(43)-C(44)-C(45) | 114.6(4) |
| C(44)-C(45)-C(38) | 112.1(3) |
| C(22)-B(1)-C(18)  | 109.3(2) |
| C(22)-B(1)-C(3)   | 120.8(2) |

|                  |          |
|------------------|----------|
| C(18)-B(1)-C(3)  | 117.3(2) |
| C(38)-B(2)-C(5)  | 122.0(3) |
| C(38)-B(2)-C(42) | 111.4(3) |
| C(5)-B(2)-C(42)  | 126.0(2) |

---

**Table S-11.** Anisotropic displacement parameters ( $\text{\AA}^2 \times 10^3$ ) for  $\text{Rh}(\text{CO})\text{Cl}(\text{PPh}_2\text{CH}_2\text{CH}_2-9\text{-BBN})_2 \cdot \text{C}_4\text{H}_{10}\text{O}$ . The anisotropic displacement factor exponent takes the form:  $-2\pi^2 [h^2 a^{*2} U_{11} + \dots + 2 h k a^* b^* U_{12}]$ .

|       | $U_{11}$ | $U_{22}$ | $U_{33}$ | $U_{23}$ | $U_{13}$ | $U_{12}$ |
|-------|----------|----------|----------|----------|----------|----------|
| Rh(1) | 31(1)    | 35(1)    | 39(1)    | 3(1)     | 1(1)     | -2(1)    |
| Cl(1) | 50(1)    | 51(1)    | 58(1)    | 4(1)     | -12(1)   | 4(1)     |
| P(1)  | 33(1)    | 40(1)    | 41(1)    | 3(1)     | 3(1)     | -4(1)    |
| P(2)  | 33(1)    | 35(1)    | 43(1)    | 3(1)     | 4(1)     | -1(1)    |
| O(1)  | 46(1)    | 63(1)    | 86(2)    | 16(1)    | -14(1)   | 6(1)     |
| C(1)  | 38(1)    | 43(1)    | 53(1)    | 2(1)     | 3(1)     | -7(1)    |
| C(2)  | 53(1)    | 45(2)    | 49(1)    | 2(1)     | 1(1)     | -12(1)   |
| C(3)  | 42(1)    | 61(2)    | 49(2)    | -2(1)    | -6(1)    | -11(1)   |
| C(4)  | 41(1)    | 39(1)    | 54(2)    | 7(1)     | 9(1)     | 2(1)     |
| C(5)  | 47(1)    | 46(1)    | 54(2)    | 3(1)     | 10(1)    | 7(1)     |
| C(6)  | 42(1)    | 42(1)    | 42(1)    | 3(1)     | -1(1)    | -8(1)    |
| C(7)  | 62(2)    | 44(2)    | 54(2)    | -1(1)    | 3(1)     | 2(1)     |
| C(8)  | 77(2)    | 44(2)    | 76(2)    | -2(2)    | -7(2)    | 6(2)     |
| C(9)  | 91(2)    | 49(2)    | 69(2)    | 17(2)    | -19(2)   | -5(2)    |
| C(10) | 91(2)    | 78(2)    | 57(2)    | 24(2)    | 7(2)     | -10(2)   |
| C(11) | 60(2)    | 72(2)    | 52(2)    | 15(1)    | 9(1)     | -2(2)    |
| C(12) | 43(1)    | 57(2)    | 56(2)    | 11(1)    | 13(1)    | 7(1)     |
| C(13) | 85(2)    | 63(2)    | 104(3)   | -7(2)    | 53(2)    | -5(2)    |
| C(14) | 145(4)   | 76(3)    | 134(4)   | -5(3)    | 80(4)    | 20(3)    |
| C(15) | 91(3)    | 131(4)   | 131(4)   | 46(3)    | 70(3)    | 54(3)    |
| C(16) | 46(2)    | 148(4)   | 104(3)   | 21(3)    | 23(2)    | 21(2)    |
| C(17) | 41(1)    | 106(3)   | 73(2)    | 9(2)     | 9(1)     | -1(2)    |
| C(18) | 63(2)    | 65(2)    | 50(2)    | 1(1)     | -7(1)    | 12(1)    |
| C(19) | 89(2)    | 73(2)    | 49(2)    | 1(2)     | -19(2)   | -10(2)   |
| C(20) | 98(2)    | 60(2)    | 61(2)    | -13(2)   | 6(2)     | -7(2)    |
| C(21) | 74(2)    | 55(2)    | 76(2)    | -5(2)    | 14(2)    | 2(2)     |
| C(22) | 51(1)    | 48(2)    | 53(2)    | 6(1)     | 2(1)     | 1(1)     |
| C(23) | 69(2)    | 66(2)    | 74(2)    | 4(2)     | 20(2)    | -11(2)   |
| C(24) | 119(3)   | 55(2)    | 76(2)    | 10(2)    | 25(2)    | -17(2)   |
| C(25) | 117(3)   | 49(2)    | 59(2)    | 13(1)    | -7(2)    | 8(2)     |

|       |        |        |        |        |        |        |
|-------|--------|--------|--------|--------|--------|--------|
| C(26) | 37(1)  | 37(1)  | 45(1)  | -3(1)  | 2(1)   | 1(1)   |
| C(27) | 57(2)  | 51(2)  | 58(2)  | -4(1)  | 2(1)   | -10(1) |
| C(28) | 67(2)  | 64(2)  | 75(2)  | -15(2) | -3(2)  | -22(2) |
| C(29) | 83(2)  | 69(2)  | 61(2)  | -15(2) | -10(2) | -11(2) |
| C(30) | 89(2)  | 73(2)  | 45(2)  | -2(1)  | 3(2)   | -11(2) |
| C(31) | 60(2)  | 54(2)  | 53(2)  | -3(1)  | 4(1)   | -12(1) |
| C(32) | 38(1)  | 38(1)  | 48(1)  | -2(1)  | 8(1)   | -3(1)  |
| C(33) | 57(2)  | 70(2)  | 59(2)  | 16(2)  | 14(1)  | 13(1)  |
| C(34) | 91(2)  | 96(3)  | 67(2)  | 23(2)  | 36(2)  | 12(2)  |
| C(35) | 76(2)  | 80(2)  | 83(2)  | -6(2)  | 45(2)  | 0(2)   |
| C(36) | 51(2)  | 67(2)  | 96(3)  | -5(2)  | 26(2)  | 13(1)  |
| C(37) | 53(2)  | 51(2)  | 66(2)  | 4(1)   | 13(1)  | 7(1)   |
| C(38) | 63(2)  | 86(3)  | 87(2)  | 25(2)  | 30(2)  | 24(2)  |
| C(39) | 114(3) | 123(4) | 96(3)  | 13(3)  | 40(3)  | 56(3)  |
| C(40) | 155(4) | 80(3)  | 138(4) | -13(3) | 65(4)  | 11(3)  |
| C(41) | 85(2)  | 61(2)  | 113(3) | 24(2)  | 11(2)  | 13(2)  |
| C(42) | 60(2)  | 74(2)  | 75(2)  | 14(2)  | 23(2)  | 21(2)  |
| C(43) | 95(3)  | 101(3) | 85(3)  | -5(2)  | 10(2)  | 12(2)  |
| C(44) | 98(3)  | 105(4) | 132(4) | 3(3)   | -51(3) | -19(3) |
| C(45) | 68(2)  | 109(4) | 183(5) | 21(4)  | 14(3)  | -27(2) |
| B(1)  | 49(2)  | 47(2)  | 46(2)  | 2(1)   | -4(1)  | -3(1)  |
| B(2)  | 43(1)  | 55(2)  | 56(2)  | 3(1)   | 10(1)  | 6(1)   |

---

—

**Table S-12.** Hydrogen atom coordinates ( $\times 10^4$ ) and isotropic displacement parameters ( $\text{\AA}^2 \times 10^3$ )  
for  $\text{Rh}(\text{CO})\text{Cl}(\text{PPh}_2\text{CH}_2\text{CH}_2\text{-9-BBN})_2 \cdot \text{C}_4\text{H}_{10}\text{O}$ .

|        | x     | y    | z    | U(eq) |
|--------|-------|------|------|-------|
| H(2A)  | 10341 | 7003 | 2193 | 59    |
| H(2B)  | 9141  | 6913 | 2491 | 59    |
| H(3A)  | 11000 | 6565 | 3077 | 62    |
| H(3B)  | 11135 | 5937 | 2650 | 62    |
| H(4A)  | 7965  | 3476 | 2500 | 53    |
| H(4B)  | 6949  | 2999 | 2143 | 53    |
| H(5A)  | 8748  | 3731 | 1593 | 58    |
| H(5B)  | 7869  | 3129 | 1316 | 58    |
| H(7)   | 7114  | 7151 | 1671 | 64    |
| H(8)   | 6381  | 8083 | 1079 | 81    |
| H(9)   | 7248  | 8330 | 261  | 86    |
| H(10)  | 8896  | 7668 | 37   | 90    |
| H(11)  | 9655  | 6727 | 621  | 73    |
| H(13)  | 9340  | 4936 | 1004 | 96    |
| H(14)  | 10954 | 4428 | 564  | 135   |
| H(15)  | 12875 | 4944 | 688  | 135   |
| H(16)  | 13234 | 5949 | 1230 | 118   |
| H(17)  | 11672 | 6459 | 1662 | 88    |
| H(18)  | 11386 | 5161 | 3619 | 73    |
| H(19A) | 11290 | 5719 | 4546 | 88    |
| H(19B) | 11451 | 6267 | 4055 | 88    |
| H(20A) | 10039 | 6779 | 4536 | 88    |
| H(20B) | 9337  | 6058 | 4600 | 88    |
| H(21A) | 9127  | 6945 | 3620 | 81    |
| H(21B) | 8044  | 6689 | 3953 | 81    |
| H(22)  | 8004  | 6121 | 3031 | 61    |
| H(23A) | 7504  | 4996 | 3286 | 83    |
| H(23B) | 7098  | 5496 | 3765 | 83    |
| H(24A) | 8621  | 5103 | 4437 | 99    |



|        |       |      |      |     |
|--------|-------|------|------|-----|
| H(24B) | 8154  | 4404 | 4108 | 99  |
| H(25A) | 9875  | 4306 | 3678 | 92  |
| H(25B) | 10372 | 4521 | 4314 | 92  |
| H(27)  | 4440  | 3275 | 1602 | 67  |
| H(28)  | 3325  | 2938 | 732  | 84  |
| H(29)  | 3797  | 3407 | -121 | 87  |
| H(30)  | 5426  | 4204 | -110 | 84  |
| H(31)  | 6556  | 4539 | 752  | 67  |
| H(33)  | 6339  | 3592 | 3068 | 73  |
| H(34)  | 4906  | 3638 | 3715 | 99  |
| H(35)  | 3090  | 4252 | 3491 | 92  |
| H(36)  | 2709  | 4869 | 2633 | 84  |
| H(37)  | 4147  | 4834 | 1985 | 67  |
| H(38)  | 10475 | 3036 | 1161 | 92  |
| H(39A) | 10985 | 1963 | 939  | 130 |
| H(39B) | 11922 | 1957 | 1508 | 130 |
| H(40A) | 10902 | 994  | 1553 | 144 |
| H(40B) | 9648  | 1341 | 1294 | 144 |
| H(41A) | 10691 | 1298 | 2425 | 104 |
| H(41B) | 9337  | 1093 | 2160 | 104 |
| H(42)  | 8732  | 2117 | 2455 | 82  |
| H(43A) | 10051 | 2975 | 2866 | 113 |
| H(43B) | 10565 | 2231 | 3094 | 113 |
| H(44A) | 12094 | 2260 | 2539 | 141 |
| H(44B) | 12109 | 2997 | 2859 | 141 |
| H(45A) | 12372 | 3101 | 1853 | 144 |
| H(45B) | 11309 | 3589 | 2031 | 144 |

---

ORTEP Representation and X-ray Crystallographic Structure Data for Compound 12

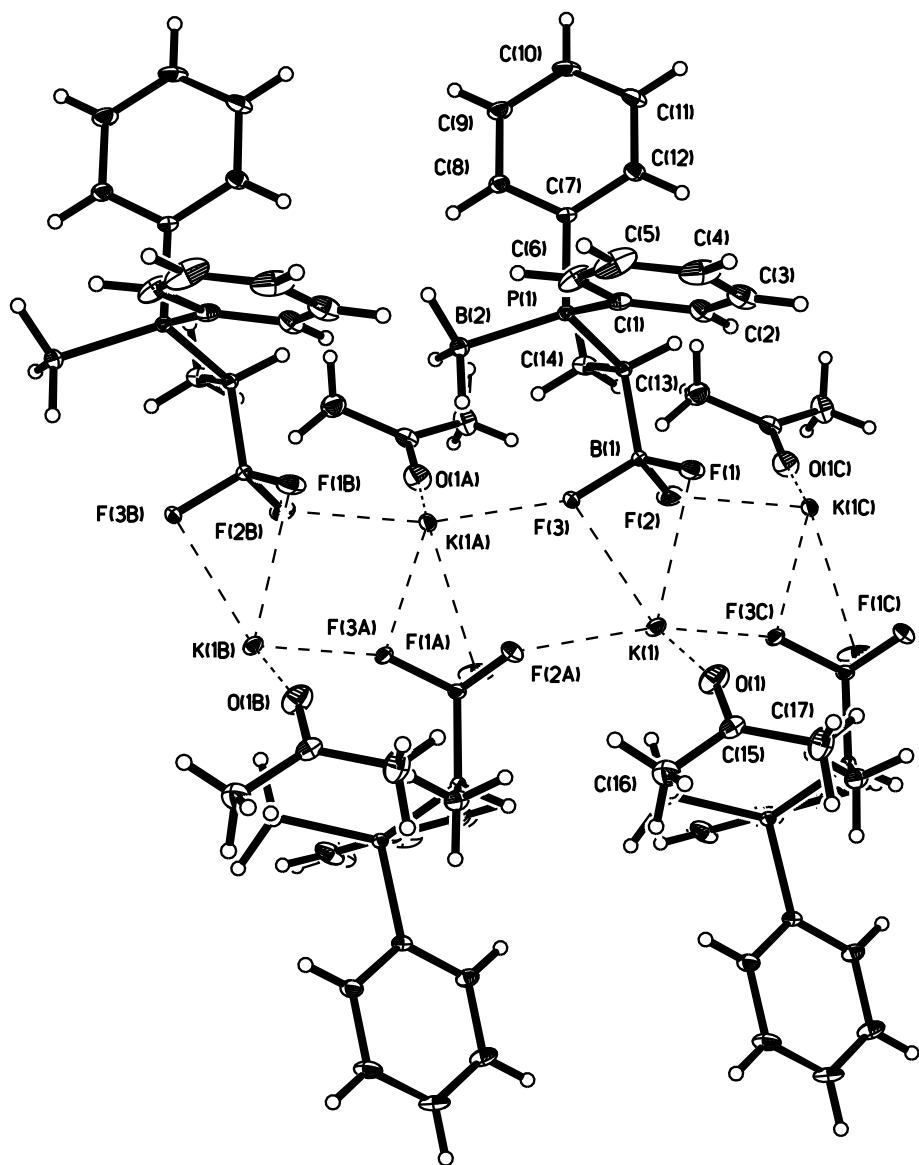

**Figure S-33.** ORTEP perspective view of the molecular arrangement of four  $\text{K}[\text{PPH}_2(\text{BH}_3)(\text{CHMeBF}_3)] \cdot \text{OCMe}_2$  units in the lattice with an atom labeling scheme for selected non-hydrogen atoms. The thermal ellipsoids are scaled to enclose 30% probability. The dashed lines indicate close contacts between  $\text{K}^+$  cations and the fluorine atoms of the neighboring anions and the O of the closest acetone molecule of solvation.

### Description of the X-ray Structural Analysis of $\text{K}[\text{PPh}_2(\text{BH}_3)(\text{CHMeBF}_3)]\cdot\text{OCMe}_2$

A colorless crystal of  $\text{K}[\text{PPh}_2(\text{BH}_3)(\text{CHMeBF}_3)]\cdot\text{OCMe}_2$  was covered in a polybutene oil (Sigma-Aldrich) and placed on the end of a MiTeGen loop. The sample was cooled to 100 K with an Oxford Cryostream 700 system and optically aligned on a Bruker AXS D8 Venture fixed-chi X-ray diffractometer equipped with a Triumph monochromator, a Mo  $\text{K}\alpha$  radiation source ( $\lambda = 0.71073 \text{ \AA}$ ), and a PHOTON 100 CMOS detector. Three sets of 12 frames each were collected using the omega scan method with a 10 s exposure time. Integration of these frames followed by reflection indexing and least-squares refinement produced a crystal orientation matrix for the monoclinic crystal lattice that was used for the structural analysis.

Data collection consisted of the measurement of a total of 740 frames in four runs using omega scans with the detector held at 5.00 cm from the crystal. Frame scan parameters are summarized in Table 1 below:

**Table S-13.** Data collection details for  $\text{K}[\text{PPh}_2(\text{BH}_3)(\text{CHMeBF}_3)]\cdot\text{OCMe}_2$ .

| Run | $2\theta$ | $\omega$ | $\varphi$ | $\chi$ | Scan Width ( $^\circ$ ) | Frame s | Exposure Time (sec) |
|-----|-----------|----------|-----------|--------|-------------------------|---------|---------------------|
| 1   | 21.90     | -160.79  | 102.00    | 54.74  | 1.00                    | 185     | 15.00               |
| 2   | 21.90     | -160.79  | 0.00      | 54.74  | 1.00                    | 185     | 15.00               |
| 3   | 21.90     | -160.79  | 153.00    | 54.74  | 1.00                    | 185     | 15.00               |
| 4   | 21.90     | -160.79  | 51.00     | 54.74  | 1.00                    | 185     | 15.00               |

The APEX3 software program (version 2016.9-0)<sup>1</sup> was used for diffractometer control, preliminary frame scans, indexing, orientation matrix calculations, least-squares refinement of cell parameters, and the data collection. The frames were integrated with the Bruker SAINT software package using a narrow-frame algorithm. The integration of the data using a monoclinic unit cell yielded a total of 41036 reflections to a maximum  $\theta$  angle of  $30.00^\circ$  ( $0.71 \text{ \AA}$  resolution), of which 5892 were independent (average redundancy 6.965, completeness = 99.8%,  $R_{\text{int}} = 3.12\%$ ,  $R_{\text{sig}} = 1.97\%$ ) and 5176 (87.85%) were greater than  $2\sigma(F^2)$ . The final cell

constants of  $a = 16.5781(6) \text{ \AA}$ ,  $b = 6.9492(3) \text{ \AA}$ ,  $c = 17.6391(7) \text{ \AA}$ ,  $\beta = 96.3164(10)^\circ$ , volume =  $2019.77(14) \text{ \AA}^3$ , are based upon the refinement of the XYZ-centroids of 9966 reflections above  $20 \sigma(I)$  with  $6.363^\circ < 2\theta < 65.42^\circ$ . Data were corrected for absorption effects using the multi-scan method (SADABS). The ratio of minimum to maximum apparent transmission was 0.892. The calculated minimum and maximum transmission coefficients (based on crystal size) are 0.834 and 0.934.

The structure was solved by direct methods and difference Fourier analysis using the programs provided by SHELXL-2014/7.<sup>2</sup> The crystallographic asymmetric unit contains a potassium cation, a  $[\text{PPh}_2(\text{BH}_3)(\text{CHMeBF}_3)]^-$  monoanion, and a molecule of acetone. Idealized positions for the hydrogen atoms bound to carbon atoms were included as fixed contributions using a riding model with isotropic temperature factors set at 1.2 (methine and aromatic hydrogens) or 1.5 (methyl hydrogens) times that of the adjacent carbon atom. The fractional coordinates and isotropic thermal parameters of the three hydrogens of the  $\text{BH}_3$  group bound to the phosphorus atom were refined. The positions of the methyl hydrogen atoms were optimized by a rigid rotating group refinement with idealized angles. Full-matrix least-squares refinement, based upon the minimization of  $\sum w_i |F_o^2 - F_c^2|^2$ , with weighting  $w_i^{-1} = [\sigma^2(F_o^2) + (0.0352 P)^2 + 1.4010 P]$ , where  $P = (\text{Max}(F_o^2, 0) + 2 F_c^2)/3$ .<sup>2</sup> The final anisotropic full-matrix least-squares refinement on  $F^2$  with 241 variables converged at  $R1 = 3.60\%$ , for the 5176 observed data with  $I > 2\sigma(I)$  and  $wR2 = 9.06\%$  for all data. The goodness-of-fit was 1.073.<sup>3</sup>

A correction for secondary extinction was not applied. The largest peak in the final difference electron density synthesis was  $0.529 \text{ e}^-/\text{\AA}^3$  and the largest hole was  $-0.442 \text{ e}^-/\text{\AA}^3$  with an RMS deviation of  $0.054 \text{ e}^-/\text{\AA}^3$ . The linear absorption coefficient, atomic scattering factors, and anomalous dispersion corrections were calculated from values found in the International Tables of X-ray Crystallography.<sup>4</sup>

## References

1. APEX3 is a Bruker AXS crystallographic software package for single crystal data collection, reduction and preparation.
2. Sheldrick, G. M., SHELXL-2014, Crystallographic software package, Bruker AXS, Inc., Madison, Wisconsin, USA.
3.  $R_1 = \sum (||F_o| - |F_c||) / \sum |F_o|$ ,  $wR_2 = [\sum w(F_o^2 - F_c^2)^2] / \sum w F_o^2]^1/2$ ,  $R_{int.} = \sum F_o^2 - F_o^2(\text{mean})^2 / \sum F_o^2$ , and  $GOF = [\sum w(F_o^2 - F_c^2)^2] / (n-p)]^{1/2}$ , where n is the number of reflections and p is the total number of parameters which were varied during the last refinement cycle.
4. International Tables for X-ray Crystallography (1974). Vol. IV, p. 55. Birmingham: Kynoch Press. (Present distributor, D. Reidel, Dordrecht.).

**Table S-14.** Crystal data for  $\text{K}[\text{PPh}_2(\text{BH}_3)(\text{CHMeBF}_3)] \cdot \text{OCMe}_2$ .

|                        |                                                            |                             |
|------------------------|------------------------------------------------------------|-----------------------------|
| Ident. code            | bp46cms                                                    |                             |
| Chemical form.         | $\text{C}_{17}\text{H}_{23}\text{B}_2\text{F}_3\text{KOP}$ |                             |
| Formula weight         | 392.04 g/mol                                               |                             |
| Temperature            | 100(2) K                                                   |                             |
| Wavelength             | 0.71073 Å                                                  |                             |
| Crystal size           | 0.188 x 0.489 x 0.509 mm                                   |                             |
| Crystal system         | Monoclinic                                                 |                             |
| Space group            | $\text{P}2_1/\text{c}$ (No. 14)                            |                             |
| Unit cell              | $a = 16.5781(6)$ Å                                         | $\alpha = 90^\circ$         |
|                        | $b = 6.9492(3)$ Å                                          | $\beta = 96.3164(10)^\circ$ |
|                        | $c = 17.6391(7)$ Å                                         | $\gamma = 90^\circ$         |
| Volume, Å <sup>3</sup> | 2019.77(14)                                                |                             |
| Z                      | 4                                                          |                             |
| Density (calc)         | 1.289 g/cm <sup>3</sup>                                    |                             |
| Abs. coefficient       | 0.370 mm <sup>-1</sup>                                     |                             |
| F(000)                 | 816                                                        |                             |

**Table S-15.** Data collection and structure refinement for  $\text{K}[\text{PPh}_2(\text{BH}_3)(\text{CHMeBF}_3)] \cdot \text{OCMe}_2$ .

|                                |                                                                  |                           |
|--------------------------------|------------------------------------------------------------------|---------------------------|
| Theta range                    | 3.15 to 30.00°                                                   |                           |
| Index ranges                   | $-23 \leq h \leq 22$ , $-9 \leq k \leq 9$ , $-19 \leq l \leq 24$ |                           |
| Reflections                    | 41036                                                            |                           |
| Independent refls              | 5892 [R(int) = 0.0312]                                           |                           |
| Coverage                       | 99.8%                                                            |                           |
| Absorption correction          | multi-scan                                                       |                           |
| Max. and min. trans.           | 0.934 and 0.834                                                  |                           |
| Refinement method              | Full-matrix least-squares on $F^2$                               |                           |
| Refinement program             | SHELXL-2014/7 (Sheldrick, 2014)                                  |                           |
| Data / restraints / parameters | 5892 / 0 / 241                                                   |                           |
| Goodness-of-fit on $F^2$       | 1.073                                                            |                           |
| Final R indices                | 5176 data;<br>$I > 2\sigma(I)$                                   | R1 = 0.0360, wR2 = 0.0862 |
|                                | all data                                                         | R1 = 0.0431, wR2 = 0.0906 |
| Largest diff. peak and hole    | 0.529 and -0.442 e <sup>-</sup> /Å <sup>3</sup>                  |                           |

**Table S-16.** Atomic coordinates and equivalent isotropic atomic displacement parameters ( $\text{\AA}^2$ ) for  $\text{K}[\text{PPh}_2(\text{BH}_3)(\text{CHMeBF}_3)] \cdot \text{OCMe}_2$ .  $U(\text{eq})$  is defined as one third of the trace of the orthogonalized  $U_{ij}$  tensor.

|     | x/a         | y/b         | z/c         | U(eq)       |
|-----|-------------|-------------|-------------|-------------|
| K1  | 0.54210(2)  | 0.81994(4)  | 0.18186(2)  | 0.01921(7)  |
| P1  | 0.23045(2)  | 0.99184(4)  | 0.25973(2)  | 0.01324(7)  |
| F1  | 0.38554(6)  | 0.71123(17) | 0.20280(7)  | 0.0442(3)   |
| F2  | 0.44094(6)  | 0.68579(14) | 0.32480(7)  | 0.0414(3)   |
| F3  | 0.42767(5)  | 0.97753(11) | 0.26915(5)  | 0.02178(17) |
| O1  | 0.55611(8)  | 0.77334(19) | 0.03559(6)  | 0.0355(3)   |
| C1  | 0.20214(8)  | 0.9173(2)   | 0.16172(7)  | 0.0192(2)   |
| C2  | 0.20928(9)  | 0.7283(2)   | 0.13661(8)  | 0.0244(3)   |
| C3  | 0.18271(10) | 0.6802(3)   | 0.06143(9)  | 0.0338(4)   |
| C4  | 0.14868(10) | 0.8184(4)   | 0.01151(9)  | 0.0436(5)   |
| C5  | 0.14188(12) | 0.0055(4)   | 0.03594(10) | 0.0474(5)   |
| C6  | 0.16897(10) | 0.0569(3)   | 0.11078(9)  | 0.0332(4)   |
| C7  | 0.13644(7)  | 0.96137(18) | 0.30323(7)  | 0.0150(2)   |
| C8  | 0.10910(8)  | 0.1084(2)   | 0.34776(8)  | 0.0213(3)   |
| C9  | 0.03675(9)  | 0.0863(2)   | 0.38064(9)  | 0.0278(3)   |
| C10 | 0.99210(8)  | 0.9187(3)   | 0.36903(9)  | 0.0280(3)   |
| C11 | 0.01869(8)  | 0.7718(2)   | 0.32477(8)  | 0.0257(3)   |
| C12 | 0.09099(8)  | 0.7926(2)   | 0.29206(7)  | 0.0200(3)   |
| C13 | 0.30023(7)  | 0.81635(17) | 0.30671(7)  | 0.0149(2)   |
| C14 | 0.31218(8)  | 0.8643(2)   | 0.39262(8)  | 0.0229(3)   |
| C15 | 0.58675(9)  | 0.7716(2)   | 0.97621(8)  | 0.0232(3)   |
| C16 | 0.61850(10) | 0.9530(3)   | 0.94415(10) | 0.0338(3)   |
| C17 | 0.59368(12) | 0.5904(2)   | 0.93177(9)  | 0.0341(4)   |
| B1  | 0.38779(9)  | 0.7985(2)   | 0.27421(9)  | 0.0194(3)   |
| B2  | 0.26397(10) | 0.2583(2)   | 0.26557(10) | 0.0230(3)   |

**Table S-17.** Interatomic distances (Å) for K[PPPh<sub>2</sub>(BH<sub>3</sub>)(CHMeBF<sub>3</sub>)]·OCMe<sub>2</sub>.<sup>a</sup>

|          |          |          |           |
|----------|----------|----------|-----------|
| K1...F2' | 2.562(1) | K1...F3* | 2.562(1)  |
| K1...O1  | 2.636(1) | K1...F1  | 2.767(1)  |
| K1...F3  | 2.795(1) | K1...F2  | 3.312(12) |
| P1-C1    | 1.816(1) | P1-C13   | 1.817(1)  |
| P1-B2    | 1.933(2) | P1-C7    | 1.824(1)  |
| F2-B1    | 1.419(2) | F1-B1    | 1.395(2)  |
| F3-B1    | 1.416(2) | O1-C15   | 1.213(2)  |
| C1-C2    | 1.395(2) | C1-C6    | 1.394(2)  |
| C3-C4    | 1.381(3) | C2-C3    | 1.391(2)  |
| C5-C6    | 1.394(2) | C4-C5    | 1.378(3)  |
| C7-C12   | 1.396(2) | C7-C8    | 1.394(2)  |
| C9-C10   | 1.384(2) | C8-C9    | 1.397(2)  |
| C11-C12  | 1.394(2) | C10-C11  | 1.386(2)  |
| C13-B1   | 1.623(2) | C13-C14  | 1.543(2)  |
| C15-C16  | 1.500(2) | C15-C17  | 1.494(2)  |

<sup>a</sup>The fractional coordinates of the symmetry related primed (') atom was determined from the relationship: 1-x, 1/2+y, 1/2-z, whereas the fractional coordinates of the symmetry related starred atom (\*) was determined from the relationship: 1-x, -1/2+y, 1/2-z.



**Table S-18.** Bond angles (°) for K[PPh<sub>2</sub>(BH<sub>3</sub>)(CHMeBF<sub>3</sub>)]·OCMe<sub>2</sub>.

|             |            |             |            |
|-------------|------------|-------------|------------|
| C1-P1-C7    | 102.95(6)  | C1-P1-C13   | 109.11(6)  |
| C1-P1-B2    | 111.52(7)  | C13-P1-C7   | 105.12(6)  |
| C7-P1-B2    | 110.05(6)  | C13-P1-B2   | 116.99(6)  |
| C15-O1...K1 | 159.47(12) | C6-C1-C2    | 119.47(14) |
| C6-C1-P1    | 117.21(12) | C2-C1-P1    | 123.28(10) |
| C3-C2-C1    | 119.96(15) | C4-C3-C2    | 120.36(17) |
| C5-C4-C3    | 119.89(15) | C4-C5-C6    | 120.62(17) |
| C5-C6-C1    | 119.69(17) | C8-C7-C12   | 119.40(11) |
| C8-C7-P1    | 119.86(10) | C12-C7-P1   | 120.74(9)  |
| C7-C8-C9    | 120.05(13) | C10-C9-C8   | 120.04(13) |
| C9-C10-C11  | 120.36(13) | C10-C11-C12 | 119.86(13) |
| C11-C12-C7  | 120.28(12) | C14-C13-B1  | 109.89(11) |
| C14-C13-P1  | 108.04(9)  | B1-C13-P1   | 116.07(9)  |
| O1-C15-C17  | 121.65(15) | O1-C15-C16  | 120.98(14) |
| C17-C15-C16 | 117.37(13) | F1-B1-F3    | 106.94(12) |
| F1-B1-F2    | 106.32(12) | F3-B1-F2    | 105.23(11) |
| F1-B1-C13   | 114.59(11) | F3-B1-C13   | 113.39(10) |
| F2-B1-C13   | 109.73(12) |             |            |

**Table S-19.** Anisotropic atomic displacement parameters ( $\text{\AA}^2$ ) for  $\text{K}[\text{PPh}_2(\text{BH}_3)(\text{CHMeBF}_3)] \cdot \text{OCMe}_2$ . The anisotropic atomic displacement factor exponent takes the form:  $-2\pi^2 [h^2 a^{*2} U_{11} + \dots + 2 h k a^* b^* U_{12}]$ .

|     | $U_{11}$    | $U_{22}$    | $U_{33}$    | $U_{23}$    | $U_{13}$    | $U_{12}$    |
|-----|-------------|-------------|-------------|-------------|-------------|-------------|
| K1  | 0.01978(13) | 0.01712(13) | 0.02267(14) | 0.00581(10) | 0.01107(10) | 0.00534(10) |
| P1  | 0.01215(14) | 0.01366(14) | 0.01461(14) | 0.00195(11) | 0.00455(10) | 0.00081(10) |
| F1  | 0.0240(5)   | 0.0548(7)   | 0.0575(7)   | -0.0413(5)  | 0.0208(4)   | -0.0140(4)  |
| F2  | 0.0186(4)   | 0.0273(5)   | 0.0787(8)   | 0.0166(5)   | 0.0067(5)   | 0.0089(4)   |
| F3  | 0.0175(4)   | 0.0134(3)   | 0.0365(5)   | -0.0040(3)  | 0.0124(3)   | -0.0040(3)  |
| O1  | 0.0435(7)   | 0.0417(7)   | 0.0236(5)   | 0.0011(5)   | 0.0147(5)   | 0.0085(5)   |
| C1  | 0.0153(5)   | 0.0292(7)   | 0.0140(5)   | 0.0022(5)   | 0.0063(4)   | 0.0011(5)   |
| C2  | 0.0256(7)   | 0.0313(7)   | 0.0175(6)   | -0.0022(5)  | 0.0076(5)   | -0.0075(6)  |
| C3  | 0.0292(8)   | 0.0520(10)  | 0.0218(7)   | -0.0106(7)  | 0.0096(6)   | -0.0124(7)  |
| C4  | 0.0260(8)   | 0.0889(16)  | 0.0159(7)   | -0.0085(8)  | 0.0022(6)   | 0.0040(9)   |
| C5  | 0.0399(10)  | 0.0825(16)  | 0.0193(7)   | 0.0103(8)   | 0.0013(7)   | 0.0285(10)  |
| C6  | 0.0320(8)   | 0.0481(10)  | 0.0201(7)   | 0.0070(6)   | 0.0057(6)   | 0.0193(7)   |
| C7  | 0.0108(5)   | 0.0206(6)   | 0.0137(5)   | -0.0003(4)  | 0.0017(4)   | 0.0007(4)   |
| C8  | 0.0166(6)   | 0.0239(6)   | 0.0241(6)   | -0.0054(5)  | 0.0059(5)   | -0.0002(5)  |
| C9  | 0.0185(6)   | 0.0367(8)   | 0.0297(7)   | -0.0102(6)  | 0.0098(5)   | 0.0011(6)   |
| C10 | 0.0122(6)   | 0.0463(9)   | 0.0267(7)   | -0.0065(6)  | 0.0073(5)   | -0.0033(6)  |
| C11 | 0.0174(6)   | 0.0366(8)   | 0.0238(7)   | -0.0068(6)  | 0.0046(5)   | -0.0106(6)  |
| C12 | 0.0180(6)   | 0.0255(6)   | 0.0174(6)   | -0.0045(5)  | 0.0052(5)   | -0.0040(5)  |
| C13 | 0.0124(5)   | 0.0120(5)   | 0.0206(6)   | 0.0027(4)   | 0.0035(4)   | 0.0000(4)   |
| C14 | 0.0185(6)   | 0.0315(7)   | 0.0184(6)   | 0.0062(5)   | 0.0012(5)   | -0.0002(5)  |
| C15 | 0.0211(6)   | 0.0298(7)   | 0.0187(6)   | -0.0005(5)  | 0.0019(5)   | 0.0062(5)   |
| C16 | 0.0317(8)   | 0.0351(8)   | 0.0356(8)   | -0.0016(7)  | 0.0089(7)   | -0.0027(7)  |
| C17 | 0.0488(10)  | 0.0310(8)   | 0.0225(7)   | -0.0026(6)  | 0.0046(7)   | 0.0067(7)   |
| B1  | 0.0131(6)   | 0.0127(6)   | 0.0338(8)   | -0.0056(5)  | 0.0084(5)   | -0.0012(5)  |
| B2  | 0.0198(7)   | 0.0152(6)   | 0.0348(8)   | 0.0047(6)   | 0.0065(6)   | -0.0002(5)  |

**Table S-20.** Hydrogen atom coordinates and isotropic atomic displacement parameters ( $\text{\AA}^2$ ) for  $\text{K}[\text{PPh}_2(\text{BH}_3)(\text{CHMeBF}_3)] \cdot \text{OCMe}_2$ .

|      | x/a        | y/b      | z/c        | U(eq)    |
|------|------------|----------|------------|----------|
| H2   | 0.2323     | 0.6324   | 0.1708     | 0.029    |
| H3   | 0.1880     | 0.5517   | 0.0444     | 0.041    |
| H4   | 0.1300     | 0.7846   | -0.0396    | 0.052    |
| H5   | 0.1185     | 1.1002   | 0.0014     | 0.057    |
| H6   | 0.1649     | 1.1865   | 0.1270     | 0.04     |
| H8   | 0.1397     | 1.2236   | 0.3558     | 0.026    |
| H9   | 0.0182     | 1.1866   | 0.4110     | 0.033    |
| H10  | -0.0570    | 0.9041   | 0.3915     | 0.034    |
| H11  | -0.0123    | 0.6571   | 0.3167     | 0.031    |
| H12  | 0.1094     | 0.6915   | 0.2620     | 0.024    |
| H13  | 0.2734     | 0.6875   | 0.3009     | 0.018    |
| H14A | 0.3421     | 0.7597   | 0.4203     | 0.034    |
| H14B | 0.2591     | 0.8791   | 0.4115     | 0.034    |
| H14C | 0.3429     | 0.9844   | 0.4006     | 0.034    |
| H16A | 0.5886     | 1.0637   | -0.0388    | 0.051    |
| H16B | 0.6113     | 0.9469   | -0.1117    | 0.051    |
| H16C | 0.6763     | 0.9669   | -0.0380    | 0.051    |
| H17A | 0.5773     | 0.4807   | -0.0386    | 0.051    |
| H17B | 0.6500     | 0.5732   | -0.0789    | 0.051    |
| H17C | 0.5583     | 0.5985   | -0.1164    | 0.051    |
| H1B2 | 0.2880(11) | 1.289(3) | 0.3271(11) | 0.030(5) |
| H2B2 | 0.3124(12) | 1.274(3) | 0.2274(11) | 0.034(5) |
| H3B2 | 0.2058(13) | 1.344(3) | 0.2480(12) | 0.045(6) |
